# Supplementary material
Source: publisher figshare collection journal article supplement (https://geolsoc.figshare.com/ndownloader/files/30894535)
Supplement: Supplementary file 1 [file 30894535]

## Sheet: Raw iolite data
	Pb204_median	Pb204_2SE(int)		Pb206_median	Pb206_2SE(int)		Pb207_median	Pb207_2SE(int)		Pb208_median	Pb208_2SE(int)		Th232_median	Th232_2SE(int)		U235_median	U235_2SE(int)		U238_median	U238_2SE(int)		TotalBeam_median	TotalBeam_2SE(int)		BeamSeconds_median	BeamSeconds_2SE(int)		Mask_median	Mask_2SE(int)		Pb204_CPS_median	Pb204_CPS_2SE(int)		Pb206_CPS_median	Pb206_CPS_2SE(int)		Pb207_CPS_median	Pb207_CPS_2SE(int)		Pb208_CPS_median	Pb208_CPS_2SE(int)		Th232_CPS_median	Th232_CPS_2SE(int)		U235_CPS_median	U235_CPS_2SE(int)		U238_CPS_median
G_NIST612
612	13939.4	550.302		236344	7075.8		214259	6184.83		502644	15165.3		1.01737e+06	30114.8		2350.18	118.054		1.02107e+06	30291.3		3.00259e+06	87272.3		16.965	1.14074		1	0		13606	550.117		236322	7075.8		214240	6184.83		502607	15165.3		1.01737e+06	30114.8		2350.17	118.054		1.02107e+06
612	13939.4	249.885		230419	3447.74		208747	3186.31		497952	7685.93		1.00417e+06	16424.2		2200.15	85.0114		990892	15680.6		2.93201e+06	45842.1		19.175	1.14074		1	0		13536.2	249.883		230401	3447.75		208730	3186.3		497914	7685.97		1.00417e+06	16424.2		2200.15	85.0114		990891
612	13939.4	252.519		234132	3344.44		210732	3115.21		500478	7178.25		1.00225e+06	16116.7		2300.17	88.545		1.00157e+06	15741		2.96856e+06	44491.5		16.9	1.14321		1	0		13548.2	252.533		234111	3344.45		210716	3115.22		500436	7178.28		1.00225e+06	16116.7		2300.16	88.5449		1.00157e+06
612	13672.5	260.564		234010	3745.76		213286	3351.37		504501	7883.63		1.00395e+06	16399.9		2300.17	86.0478		993304	15792.9		2.97255e+06	47463.5		17.29	1.14321		1	0		13290.7	260.581		233992	3745.77		213270	3351.4		504461	7883.63		1.00395e+06	16399.9		2300.17	86.0478		993304
612	13772.5	262.242		232427	3471.06		209638	3186.59		494600	7581.43		986661	15599		2400.18	84.936		985112	15003		2.92315e+06	44653.5		16.51	1.14321		1	0		13376.1	262.254		232410	3471.06		209622	3186.6		494562	7581.44		986661	15599		2400.18	84.936		985112
612	13739.2	264.945		230216	3478.21		208889	3268.1		492538	7766.31		986502	15860.2		2300.17	85.5638		976569	15517.5		2.90433e+06	46263.8		17.16	1.14321		1	0		13352.2	264.871		230196	3478.22		208872	3268.11		492494	7766.32		986502	15860.2		2300.17	85.5638		976568
612	13739.2	268.897		231494	3620.61		208868	3340.89		500942	7899.27		978634	16263.7		2300.17	91.7936		973451	15346.9		2.90697e+06	46049.8		15.86	1.14321		1	0		13371	268.775		231475	3620.62		208853	3340.9		500905	7899.26		978634	16263.8		2300.11	91.7936		973450
612	13605.7	284.309		231575	3572.84		211016	3356.49		500685	8086.91		989427	16203.8		2200.15	83.5518		985147	15572.3		2.94217e+06	46425.5		21.97	1.14321		1	0		13227.1	284.283		231556	3572.85		211001	3356.49		500650	8086.94		989426	16203.8		2200.15	83.5518		985147
612	13605.7	234.42		229425	3474.08		207936	3105.74		496353	7629.53		985332	16362		2300.17	84.9054		977065	15664.1		2.91556e+06	46218.5		16.835	1.14074		1	0		13231.8	234.338		229405	3474.1		207920	3105.75		496319	7629.57		985332	16362		2300.17	84.9054		977065
612	13672.5	245.657		231981	3546.57		211746	3121.45		504862	7495.17		999162	15728.2		2200.15	79.7003		980042	15415.1		2.94709e+06	45055.5		16.9	1.14321		1	0		13302.4	245.606		231963	3546.57		211729	3121.46		504823	7495.22		999162	15728.2		2200.15	79.7003		980042
612	13539	251.939		228999	3421.34		210388	3265.07		490477	7514.87		983152	15441.7		2300.17	84.3432		975577	14772.8		2.89559e+06	44051.6		30.03	1.14321		1	0		13154	251.903		228979	3421.34		210373	3265.07		490440	7514.89		983152	15441.7		2300.17	84.3432		975577
612	13939.4	257.231		232103	3562.65		212110	3220.33		500685	8115.69		994693	15671.7		2200.15	88.8467		985147	15160.8		2.92972e+06	45578		17.03	1.14321		1	0		13565.1	257.201		232085	3562.67		212094	3220.35		500645	8115.71		994693	15671.7		2200.14	88.8466		985147
612	13739.2	257.767		235106	3602.22		212658	3231.49		499653	7746.94		998790	16136.8		2300.17	87.8869		986495	15551.1		2.95087e+06	45987.5		25.415	1.14074		1	0		13364.6	257.727		235087	3602.22		212643	3231.52		499615	7746.94		998789	16136.8		2300.17	87.8868		986495
612	13672.5	258.549		230074	3572.79		207167	3211.44		493518	7643.82		978421	16192.1		2200.15	83.0379		966012	15649.3		2.90228e+06	46051		17.94	1.14321		1	0		13300.6	258.503		230055	3572.8		207150	3211.45		493477	7643.87		978421	16192.1		2200.15	83.0379		966011
612	13672.5	272.2		227518	3451.62		204736	3206.45		491250	7315.58		974595	16301.9		2200.15	91.5298		975010	15661.2		2.87864e+06	45950.3		19.37	1.14321		1	0		13315.5	271.544		227496	3451.67		204720	3206.51		491208	7315.71		974594	16301.9		2200.16	91.5298		975010
C_WC1_2
WC1	400	31.0975		2560.2	210.096		240	192.319		200	425.348		0	3.30349		400.01	38.7028		69218.8	2076.07		72406.6	2797.97		18.85	1.14321		1	0		31.7191	31.2349		2539.57	210.087		223.127	192.306		161.306	425.349		0.0130288	3.3035		400.013	38.7027		69218.3
WC1	400	28.7096		4520.64	140.337		440.01	51.1655		600.01	138.813		0	8.05823		800.02	49.0034		115422	1787.9		123182	1917		17.42	1.14321		1	0		-15.5325	28.7327		4502.71	140.332		425.288	51.1545		561.036	138.809		0.0232528	8.05816		800.02	49.0034		115422
WC1	400	31.1194		4680.68	170.421		400	160.912		400.01	190.701		0	3.21267		900.03	48.8214		127247	2768.19		135089	2977.8		20.41	1.14321		1	0		58.7351	31.1587		4659.9	170.409		382.117	160.913		356.304	190.7		-0.0359219	3.21257		900.032	48.8214		127246
WC1	466.67	26.2246		4840.73	137.831		400	57.1593		300	110.739		0	3.5926		800.02	55.6776		130103	2533.54		138336	2701.09		17.42	1.14321		1	0		65.9981	26.2308		4822.02	137.832		381.747	57.1682		262.321	110.719		-0.149046	3.59265		800.02	55.6776		130102
WC1	400	29.2371		5080.8	206.366		520.01	128.47		600.01	280.37		0	8.66859		900.03	54.528		130406	2836.01		137597	3241.58		19.76	1.14321		1	0		-4.47685	29.2856		5062.82	206.363		503.974	128.469		562.813	280.353		-0.646145	8.6686		900.03	54.528		130406
WC1	400	27.8424		5600.98	106.04		520.01	33.8126		500.01	71.4529		0	14.2456		1100.04	55.6728		151393	1575.15		160039	1691.2		20.93	1.14321		1	0		9.92678	27.8231		5581.14	106.034		503.317	33.8095		456.401	71.4265		-0.00218772	14.2456		1100.03	55.6728		151392
WC1	400	28.4438		5861.07	175.161		520.01	92.9063		700.02	179.63		0	15.6659		1100.04	61.0918		155701	2625.12		165194	2796.17		17.095	1.14074		1	0		23.1286	28.4793		5841.73	175.152		503.274	92.9095		664.476	179.618		-0.25182	15.6662		1100.02	61.0917		155700
WC1	466.67	30.4889		5721.02	113.367		680.01	49.6635		1000.03	110.071		0	13.0952		1050.04	57.1072		146278	2658.27		155081	2818.8		18.2	1.14321		1	0		77.4922	30.5059		5702.97	113.348		665.288	49.6597		963.641	110.073		-0.0406505	13.0952		1050.04	57.1072		146277
WC1	466.67	30.6693		6721.41	238.689		720.02	93.4187		1000.03	209.047		100	20.3142		1100.04	63.2048		167218	4582.04		177216	4916.78		18.59	1.14321		1	0		82.7477	30.6855		6700.64	238.681		703.248	93.4135		962.339	209.044		99.9748	20.314		1100.04	63.2048		167218
WC1	400	29.2568		5240.85	154.604		760.02	71.5724		1300.05	195.012		0	8.38952		900.03	52.0129		128725	1751.31		137672	2010.49		18.59	1.14321		1	0		26.3803	29.2402		5223.22	154.6		742.543	71.5722		1258.05	195.007		-0.116775	8.38945		900.03	52.0129		128725
WC1	400	29.5298		5320.88	215.573		360	109.185		300	226.334		0	7.7379		1100.04	58.9922		144528	4072.77		153442	4522.16		18.395	1.14074		1	0		9.06787	29.5482		5302.48	215.557		344.834	109.183		263.98	226.31		-0.026535	7.73776		1100.04	58.9922		144528
WC1	400	32.979		5180.84	184.361		560.01	110.976		700.02	242.285		0	10.7565		1000.03	49.879		135515	2743.8		144631	2941.2		22.1	1.14321		1	0		17.6449	33.0003		5162.65	184.357		542.249	110.98		660.009	242.277		-0.0238126	10.7565		1000.03	49.879		135515
WC1	400	30.5311		6801.44	169.788		560.01	56.6493		500.01	151.293		0	13.2512		1300.05	63.6593		175239	3807.56		184360	3947.65		17.55	1.14321		1	0		22.2305	31.1123		6784.23	169.762		543.139	56.6583		463.558	151.275		-0.396183	13.2503		1300.05	63.6593		175238
WC1	400	28.6625		6001.12	166.977		600.01	50.7909		700.02	186.171		0	10.8641		1000.03	56.1099		143284	4356.99		151389	4400.6		17.29	1.14321		1	0		22.6625	28.6766		5981.95	166.975		584.488	50.7791		657.48	186.15		-0.0160823	10.8641		1000.03	56.1099		143283
WC1	400	27.0455		3840.46	161.049		480.01	52.2056		600.01	102.059		0	6.02248		700.02	53.6552		93980.2	3563.38		99645.8	3756.47		16.12	1.14321		1	0		166.797	27.0518		3811.12	161.158		435.898	52.2731		536.003	102.221		-0.473278	6.02226		699.98	53.6559		93978.9
sample
S02	733.35	41.1359		120	222.166		80	263.874		200	664.163		0	126.919		0	10.5173		0	546.071		1333.35	1868.14		44.98	1.14321		1	0		408.913	66.0286		660.533	655.506		504.851	699.103		1062.57	1341		500.007	255.107		-0.00868802	23.3116		2966.77
S02	666.68	39.0829		120	379.727		120	274.595		300	688.372		0	22.707		0	0		0	112.359		1363.36	1269.46		24.44	1.14321		1	0		538.509	118.441		2022.25	1681.58		2545.93	1201.53		7566.93	2825.21		50.0009	146.247		-0.0140984	9.09197		400.047
S02	733.35	50.3993		320	404.121		280	391.914		600.01	1262.37		400.01	62.1566		0	0		666.68	236.551		3200.08	2816.88		18.2	1.14321		1	0		339.34	50.9019		303.2	435.416		265.411	417.403		567.143	1281.7		400.01	62.9672		0.00268359	3.61691e-05		666.683
S02	666.68	38.7609		440.01	221.391		320	198.746		800.02	485.397		200	110.853		0	1.94404		266.67	177.114		2540.05	1132.69		17.94	1.14321		1	0		271.237	43.1946		583.359	335.068		385.365	297.583		1118.1	654.924		299.998	134.744		-0.00120871	2.25947		333.287
S02	733.35	37.5537		360	148.617		320	142.645		700.02	377.657		0	7.25399		0	0		133.33	19.6375		2296.72	663.289		18.98	1.14321		1	0		268.391	63.9369		423.366	632.844		425.085	517.054		867.784	1258.43		0.00724782	22.4778		0.00226532	5.45712e-05		200.004
S02	666.68	33.8604		800.02	202.707		360	152.375		900.03	367.256		5801.07	284.509		100	20.5639		17943.6	871.597		28465.5	1279.6		22.62	1.14321		1	0		254.974	33.9053		783.144	202.709		343.77	152.384		866.967	367.256		5801.02	284.509		99.9871	20.5638		17943.4
S02	733.35	38.8656		440.01	326.765		360	259.951		900.03	605.318		100	180.529		0	0		666.68	142.339		3160.07	1575.45		17.225	1.14074		1	0		308.18	39.3337		422.989	333.804		363.207	265.549		966.873	638.09		199.955	184.67		-0.0121117	0.000320069		666.228
S02	600.01	34.1832		160	92.9597		80	88.0563		200	206.625		0	17.4729		0	1.50936		733.35	46.3704		2166.7	376.78		18.59	1.14321		1	0		170.84	34.4653		141.812	82.2442		63.9391	71.5668		166.768	165.293		-0.00227006	17.0376		0.00383644	1.53271		732.77
S02	666.68	34.953		280	109.532		200	108.295		500.01	200.895		200	25.5923		0	3.05798		1400.06	62.6731		3313.41	447.873		18.72	1.14321		1	0		238.418	34.9528		260.573	109.538		184.796	108.291		466.09	200.906		199.977	25.5922		-0.00829941	3.05795		1399.6
S02	733.35	32.8952		1480.07	152.431		1120.04	129.885		2700.23	347.526		200	51.8253		0	2.28481		1033.37	61.018		7663.73	731.033		37.7	1.14321		1	0		302.803	32.8879		1460.47	152.433		1104.28	129.882		2665.22	347.525		200.014	51.8253		-0.00765459	2.28482		1033.25
S02	666.68	36.4539		160	136.077		120	123.906		300	295.261		100	20.9879		0	2.11558		666.68	47.8566		2070.03	506.833		27.43	1.14321		1	0		231.145	37.3321		140.954	139.457		143.634	137.634		264.823	302.997		99.9557	21.387		0.00122812	2.17183		666.687
S02	600.01	37.4938		360	129.723		120	117.497		300	241.306		3700.43	162.781		0	13.9232		12204.7	489.378		18739.8	560.085		25.61	1.14321		1	0		162.56	37.4941		342.308	129.713		104.091	117.491		264.786	241.308		3700.39	162.782		0.000824154	13.9232		12204.8
S02	600.01	32.0449		200	106.782		120	89.6821		400.01	206.494		0	11.3744		0	0		266.67	24.3161		1776.68	411.396		30.94	1.14321		1	0		231.674	36.354		143.306	140.113		144.829	117.015		364.573	270.04		0.00687554	16.0845		-0.00555485	0.000205796		266.571
S02	700.015	37.1216		1840.11	115.789		1240.05	112.36		2900.26	246.293		5400.92	209.653		100	24.395		24485.7	1036		38664.8	1356.21		20.93	1.14321		1	0		306.582	37.0983		1823.16	115.791		1224.53	112.364		2866.29	246.284		5400.92	209.653		99.9958	24.395		24485.3
S02	733.35	38.9099		560.01	323.222		520.01	249.07		1200.04	634.959		300	89.3433		0	3.07715		1266.72	235.505		4433.47	1590.43		18.46	1.14321		1	0		321.433	38.8685		542.586	323.226		503.52	249.076		1166.04	634.976		299.967	89.3439		0.00127562	3.07715		1266.09
S02	666.68	40.2557		1160.04	364.31		680.01	290.778		1500.07	696.262		5751.05	287.237		100	20.8283		20279.8	913.022		34465.8	2009.96		28.21	1.14321		1	0		225.466	40.2644		1142.91	364.309		666.007	290.777		1463.48	696.262		5750.96	287.235		100	20.8283		20279.6
S02	1266.72	61.9059		11844.4	813.619		9122.59	700.964		22415.6	1675.6		23818	1018.11		400.01	35.4878		57538.5	1649.89		129294	5143.73		23.92	1.14321		1	0		812.731	61.9102		11828.7	813.607		9108.91	700.961		22381.9	1675.59		23817.7	1018.11		400.01	35.4878		57538.5
S02	800.02	40.7094		3400.36	322.295		2960.27	273.713		7201.61	674.54		1600.08	341.331		0	7.28813		2333.51	265.389		22109.8	1470.49		17.81	1.14321		1	0		421.612	40.7059		3385.32	322.297		2946.64	273.715		7168.99	674.536		1599.82	341.329		1.00054e-06	7.28813		2333.47
S02	600.01	30.7912		200	103.375		120	79.1142		300	198.553		400.01	40.8015		0	3.57064		1733.43	116.65		3320.11	482.287		23.92	1.14321		1	0		178.556	30.7834		183.754	103.384		105.385	79.1217		267.307	198.558		399.961	40.8005		-9.64519e-06	3.57064		1733.46
S02	1733.43	79.4031		21033.7	1127.28		17209.2	956.732		41303	2371.42		26021.4	522.562		500.01	38.7442		73170	1403.29		183114	4636.44		17.095	1.14074		1	0		1325.42	79.3745		21016.7	1127.28		17193.6	956.736		41269.6	2371.42		26021.4	522.562		500.01	38.7442		73169.8
S02	666.68	35.1571		440.01	135.869		280	104.32		600.01	277.282		1000.03	182.884		0	13.0847		1400.07	1366.61		3760.12	1932.55		20.67	1.14321		1	0		256.748	35.9352		422.343	139.739		264.18	115.767		565.575	285.841		1099.89	185.915		-0.000138292	13.4413		1633.03
S02	666.68	33.1666		1400.06	198.1		680.01	147.628		1700.09	385.577		6501.34	350.263		200	27.8952		33769.6	1455.78		44050.6	2479.36		19.76	1.14321		1	0		248.443	33.1757		1381.43	198.106		664.971	147.62		1663.45	385.596		6501.26	350.261		200	27.8952		33769.1
S02	933.36	52.0922		8282.13	511.12		5180.84	424.529		12655	1029.24		39198.6	1420.49		900.03	59.6878		143586	5420.15		228232	6935.61		21.71	1.14321		1	0		508.26	52.1008		8263.92	511.108		5166.21	424.528		12617.5	1029.24		39198.6	1420.49		900.027	59.6878		143586
S02	733.35	51.1309		1540.08	694.107		1280.05	605.125		2800.24	1460.49		400.01	69.0695		0	2.15298		1866.78	168.669		9353.87	2947.76		15.73	1.14321		1	0		310.697	51.0942		1523.94	694.09		1265.44	605.125		2762.06	1460.5		399.968	69.0701		-0.00262572	2.15297		1866.67
S02	800.02	42.3173		3360.35	224.248		2840.25	194.048		6701.4	446.866		4300.59	265.134		0	17.8089		17810.1	953.751		34065.4	1745.26		16.25	1.14321		1	0		384.111	42.3198		3344.79	224.248		2825.6	194.048		6662.71	446.866		4300.54	265.134		0.000579542	17.8089		17810
S02	733.35	38.8726		1560.08	260.432		1160.04	243.958		2700.23	659.478		1700.09	112.495		0	14.4544		12871.9	725.234		22259.9	1334.75		19.89	1.14321		1	0		315.641	38.8646		1543.08	260.426		1145.6	243.959		2662.04	659.479		1700.1	112.495		-0.000187833	14.4544		12871.5
S02	600.01	36.5404		1320.05	141.885		600.01	112.788		1300.05	268.771		6801.47	758.607		100	29.5805		21214.3	2680.11		34682.7	3463.39		15.99	1.14321		1	0		173.365	36.544		1301.64	141.888		585.756	112.789		1262.96	268.765		6801.47	758.607		100	29.5805		21213.6
S02	600.01	35.7616		280	153.213		240	77.7962		600.01	162.003		100	105.753		0	2.58438		200	338.953		2066.7	758.46		18.33	1.14321		1	0		171.951	42.2582		341.321	213.786		305.134	110.077		863.522	250.614		99.9757	134.512		-0.000526309	4.01973		399.23
S02	666.68	36.078		800.02	190.903		480.01	161.902		1200.04	391.029		2000.13	314.965		0	13.6563		6234.57	823.372		14092.1	1186.53		16.315	1.14074		1	0		248.354	36.049		781.375	190.903		464.707	161.903		1163.48	391.036		2000.09	314.966		0.00215652	13.6563		6233.93
S02	1133.37	49.5547		9442.77	503.674		7281.65	453.563		17509.5	1065.79		9702.98	338.69		100	22.0303		23517.6	948.212		71695.8	2481.99		20.41	1.14321		1	0		729.577	49.5362		9423.28	503.679		7266.01	453.566		17470.8	1065.8		9702.99	338.69		99.9908	22.0302		23517.2
S02	600.01	37.942		1320.05	91.4319		480.01	90.5429		1100.04	219.446		12905.3	448.65		300	28.7391		39750.2	1398.64		57420.3	1560.43		15.99	1.14321		1	0		176.271	37.9583		1300.3	91.4251		442.441	90.5403		1058.01	219.432		12905.3	448.649		300	28.7391		39750.1
S02	733.35	37.5396		3880.47	164.589		1760.1	116.36		4200.55	284.086		27674.2	1914.71		700.02	58.5953		76150.8	5090.55		112783	6704.97		19.11	1.14321		1	0		305.423	37.5422		3861.89	164.587		1742.81	116.359		4162.19	284.059		27674.3	1914.71		700.017	58.5953		76150.7
S02	733.35	47.6828		3360.35	587.958		1640.08	442.882		4000.5	799.182		26221.8	377.162		500.01	38.2188		80137.2	1063.21		116379	2269.05		15.73	1.14321		1	0		309.696	47.6784		3343.64	587.947		1623.16	442.878		3966.25	799.164		26221.6	377.162		500.01	38.2188		80136.9
S02	1666.75	161.836		29467	2801.7		22856.2	2369.71		55495.7	5864.65		40251.3	1930.7		800.02	61.6395		109178	5503.5		303831	16155.2		18.46	1.14321		1	0		1243.03	161.832		29451.4	2801.7		22840.6	2369.7		55463.3	5864.65		40250.9	1930.7		800.013	61.6396		109178
S02	666.68	36.2241		1360.06	188.376		800.02	152.165		1900.11	370.276		7851.95	946.368		100	25.3114		24619.3	1639.77		40399.6	3050.47		17.81	1.14321		1	0		247.13	36.2119		1344.6	188.374		785.858	152.156		1867	370.284		7851.35	946.368		99.9942	25.3114		24619.3
S02	600.01	36.8372		1040.03	182.641		440.01	130.749		1000.03	340.685		9302.74	463.596		200	27.3825		31631.8	1458.65		46870.2	2365.94		17.55	1.14321		1	0		186.481	36.8278		1024.24	182.647		426.94	130.744		966.494	340.685		9302.29	463.593		199.997	27.3825		31631.8
S02	2733.57	130.262		40972.1	2046.12		34276.5	1777.54		81908.3	3978.4		32333.1	1356.47		600.01	46.6204		82549.6	3992.91		287131	12672		23.53	1.14321		1	0		2325.39	130.209		40955.3	2046.13		34263.7	1777.54		81874.7	3978.41		32333	1356.47		600.005	46.6203		82549.6
S02	666.68	31.2393		1640.08	139.654		880.02	124.336		1900.11	320.693		13605.9	493.517		200	23.8477		32099.4	1246.36		56452.9	1686.48		16.51	1.14321		1	0		260.608	31.2407		1622.69	139.654		866.243	124.349		1865.15	320.711		13605.9	493.517		200.003	23.8477		32099.4
S02	1400.06	65.8109		15707.7	824.738		12645	671.928		29577.2	1587.26		25220.1	1331.92		400.01	47.5202		75514.4	3951.52		167618	7635		15.795	1.14074		1	0		991.315	65.7904		15690.7	824.744		12629.7	671.919		29539.8	1587.24		25220	1331.92		399.999	47.5201		75514.1
S02	600.01	34.9304		600.01	161.987		320	139.58		800.02	297.366		600.01	643.012		0	18.7121		2133.48	2062.11		7457.21	2756.06		16.64	1.14321		1	0		186.138	34.939		583.718	161.985		304.409	139.577		761.378	297.365		599.705	643.01		-0.0114964	18.7122		2133.34
S02	1066.7	51.832		11324	323.154		8642.32	285.151		20513.1	711.638		30028.5	867.047		500.01	41.6269		66406.7	3029.43		136950	3666.36		18.98	1.14321		1	0		651.022	51.8324		11307.2	323.157		8627.07	285.151		20475	711.633		30028.2	867.048		500.012	41.6269		66406.7
S02	600.01	41.4205		920.03	399.827		600.01	341.337		1300.05	777.639		5651.01	256.296		0	13.1903		12805.2	630.39		24229.3	2284.07		18.07	1.14321		1	0		185.354	41.4103		902.54	399.829		584.826	341.335		1263.98	777.618		5650.89	256.294		-0.000537716	13.1903		12805
S02	3333.68	284.151		45664.7	3027.08		37764.3	2742.45		89247.3	6478.36		37344.1	907.878		450.01	44.1548		80907.8	2940.46		289817	11643.8		15.795	1.14074		1	0		2919.39	284.154		45647.6	3027.07		37749.6	2742.44		89212.1	6478.37		37344.2	907.878		500.01	44.1548		80907.5
S02	566.675	31.4537		640.01	95.2054		240	100.84		600.01	210.957		7001.55	303.482		0	18.9942		18410.8	789.052		27865.7	1407.26		16.12	1.14321		1	0		155.772	31.4484		623.194	95.2083		226.125	100.837		563.36	210.967		7001.54	303.482		-3.08285e-05	18.9942		18410.4
S02	666.68	40.6564		3640.41	210.562		2160.15	165.845		5400.91	425.773		20112.8	939.953		400.01	38.0646		52888.9	2224.43		88499.7	3099.74		15.86	1.14321		1	0		335.336	40.6544		3622.75	210.561		2146.12	165.845		5362.04	425.775		20112.8	939.953		400.01	38.0646		52888.5
S02	12871.8	624.483		216812	11154		187123	9585.18		455468	23351.9		86838.3	8365.46		200	35.039		43660.6	3062.99		1.09215e+06	52832.7		19.89	1.14321		1	0		12446.3	624.629		216793	11154		187104	9585.18		455433	23351.9		86838.2	8365.46		200	35.039		43659.9
S02	666.68	39.0913		1120.04	263.025		960.03	280.661		2000.12	701.171		300	101.406		0	1.93981		466.67	109.751		5920.26	1347.53		25.61	1.14321		1	0		228.093	42.4095		1201.81	320.344		1022.77	324.217		2214.95	809.398		400.031	111.302		-0.000113018	2.2079		532.818
S02	933.36	52.4965		6901.48	514.177		5280.87	422.232		12604.9	1316.65		17409.6	563.851		300	31.179		42724.7	1268.01		80459.2	3441.08		16.9	1.14321		1	0		495.752	52.4759		6883.79	514.174		5265.18	422.222		12568.9	1316.66		17409.6	563.852		300	31.179		42724.3
S02	666.68	36.6925		440.01	212.084		320	219.77		700.02	370.511		700.02	103.661		0	3.7994		2466.86	214.124		7037.08	772.236		16.25	1.14321		1	0		236.708	39.1309		422.228	246.979		305.382	264.039		763.426	488.116		899.981	113.085		-0.00181757	7.09533		2733.45
S02	1000.03	58.9627		7361.68	802.957		5520.95	692.211		13705.9	1705.52		23467.4	885.431		300	32.1583		47271	1685.34		95014.9	5322.84		24.44	1.14321		1	0		580.996	58.9059		7344.44	802.947		5507.15	692.205		13669.2	1705.51		23467.4	885.431		300	32.1582		47271
S02	733.35	39.1933		2840.25	181.17		2160.15	155.749		5300.87	377.541		6201.22	285.555		100	22.737		25287	668.48		44239.8	1088.6		16.835	1.14074		1	0		321.257	39.1878		2824.01	181.168		2146.5	155.749		5264.88	377.539		6201.22	285.555		99.9954	22.737		25286.8
S02	733.35	38.0101		3840.46	250.349		2380.18	207.444		5500.94	543.992		16909.1	384.843		400.01	33.2494		53089.6	812.018		83998.6	1672.32		21.06	1.14321		1	0		322.194	38.0094		3824.55	250.352		2366.27	207.447		5468.87	543.956		16909.1	384.843		299.997	33.2495		53089.5
S02	2466.86	341.322		36762	5920.96		30889.7	5236.24		73970	12957.4		34487.7	739.007		400.01	34.9793		65268.6	1219.27		256085	24332.4		16.38	1.14321		1	0		2057.79	341.282		36745.8	5920.96		30875.4	5236.24		73940.4	12957.4		34487.6	739.007		400.003	34.9793		65268.6
S02	1200.04	61.1613		12444.8	662.666		10283.3	563.863		25119.6	1374.05		5851.09	455.615		0	12.9153		9969.83	302.53		66592.9	3052.42		19.305	1.14074		1	0		791.888	61.1505		12428.8	662.667		10268.7	563.862		25089.5	1374.04		5851.09	455.615		-0.00996661	12.9153		9969.59
S02	600.01	40.3747		1840.11	294.803		1120.04	202.985		2800.24	571.012		6101.18	1467.39		200	37.5885		13872.8	4198.02		24480.6	6400.5		23.66	1.14321		1	0		191.013	40.3737		1824.34	294.802		1105.19	202.986		2766.95	571.049		6101.15	1467.39		200.004	37.5885		13872.4
S02	666.68	46.2851		1480.07	438.914		1160.04	357.636		2600.21	968.543		1700.09	167.342		0	10.3324		4133.88	514.947		12874.7	2023.46		18.85	1.14321		1	0		258.883	46.2828		1463.77	438.917		1144.92	357.637		2564.13	968.549		1700.07	167.342		-0.0115314	10.3324		4133.52
S02	666.68	35.5239		920.03	189.491		680.01	165.307		1700.09	413.273		1600.08	99.3811		0	8.194		5534.31	213.582		12705.3	537.429		23.01	1.14321		1	0		255.882	35.549		902.769	189.5		664.523	165.308		1663.88	413.268		1600.09	99.3811		-0.0113943	8.19402		5534.11
S02	600.01	30.5211		280	131.267		240	128.653		600.01	309.355		0	9.78987		0	0		0	10.3385		1780.03	623.582		19.89	1.14321		1	0		485.605	159.413		5203.17	1815.61		6086.02	1832.37		14070.6	4544.84		-0.00618882	89.1893		0.00235936	7.06988e-06		266.6
S02	2000.12	237.429		28324.9	3940.19		23777.6	3568.64		58556.6	8313		19862.5	2031.69		150	23.3941		28091.8	1099.38		174163	15171.8		16.38	1.14321		1	0		1591.69	237.353		28307.4	3940.19		23762.7	3568.65		58520.9	8313.01		19862.5	2031.69		149.999	23.3941		28091.7
S02	1733.43	81.3775		26101.2	1180.82		21614.5	1009.6		51984	2445.33		25721	933.111		400.01	36.4813		58910.2	2476.91		208989	6642.53		27.04	1.14321		1	0		1332.33	81.3255		26084	1180.82		21599.1	1009.6		51947.1	2445.35		25720.9	933.113		400.01	36.4813		58910
S02	666.68	38.3819		640.01	153.451		480.01	149.68		1000.03	332.309		2200.15	148.364		0	10.0124		9669.64	609.745		16490.2	1140.7		16.64	1.14321		1	0		238.888	38.422		622.289	153.451		464.596	149.673		965.889	332.29		2199.64	148.361		-2.97458e-06	10.0124		9669.4
S02	600.01	33.9899		280	145.864		240	124.132		500.01	343.115		200	26.555		0	0		733.35	42.7228		2650.06	608.267		33.28	1.14321		1	0		168.163	34.6446		261.893	150.52		225.233	128.179		467.575	354.774		199.884	26.8086		8.7678e-07	1.24408e-08		733.232
S02	666.68	42.0402		640.01	204.645		540.01	185.801		1300.05	427.059		100	22.8771		0	0		333.34	31.9036		3593.45	870.255		25.48	1.14321		1	0		239.448	50.1363		661.338	259.76		525.21	214.8		1368.9	498.85		150.02	26.4515		-2.23622e-07	3.848e-09		400.029
S02	533.34	31.0265		80	120.978		40	95.2358		100	256.549		200	33.6835		0	4.62316		866.69	124.822		1983.38	913.958		23.53	1.14321		1	0		116.149	31.367		61.5401	122.946		25.5299	96.7902		69.1152	260.776		199.995	33.9412		6.2121e-08	4.7039		866.686
S02	800.02	41.3984		4860.73	329.197		3760.44	299.946		9102.58	609.758		17209.4	503.816		100	18.1909		20913.9	596.336		55164.8	2140.57		17.42	1.14321		1	0		392.8	41.3674		4842.76	329.194		3746.38	299.944		9070.22	609.774		17209.4	503.816		100	18.1909		20913.9
S02	600.01	31.5237		480.01	159.02		420.005	313.298		1100.04	307.763		200	47.4037		0	2.11558		1000.03	87.6065		3903.43	907.487		16.25	1.14321		1	0		197.599	32.3272		622.186	205.925		545.738	342.676		1466.58	333.275		300.005	51.9076		7.87262e-09	2.33758		1133.39
S02	533.34	32.5833		320	146.303		280	120.531		700.02	305.149		200	111.851		0	0		200	54.9668		2553.41	693.286		18.07	1.14321		1	0		198.495	38.4521		862.61	215.345		705.402	206.538		1766.69	544.313		299.972	165.331		-1.48285e-08	2.88397		466.566
S02	533.34	33.0771		240	153.219		160	155.249		400.01	288.934		800.02	73.1357		0	3.41071		1600.08	180.29		4383.48	606.597		18.72	1.14321		1	0		127.463	33.1212		224.114	155.848		145.46	157.845		367.061	293.679		799.984	75.2306		5.98529e-08	3.46972		1599.84
S02	533.34	31.6166		280	157.207		240	132.736		600.01	336.595		100	27.7106		0	0		200	72.0789		2310.04	658.253		25.09	1.14321		1	0		123.32	40.1662		304.956	306.053		225.458	257.166		667.454	591.85		100.007	37.3184		-2.04011e-07	3.95678e-09		266.625
S02	600.01	33.9683		480.01	183.683		400	162.88		900.03	371.001		800.02	67.0149		0	3.70481		3600.41	185.245		6633.85	867.38		16.9	1.14321		1	0		194.134	34.2395		464.602	185.101		385.516	164.171		867.706	373.934		800.018	66.8862		8.0463e-07	3.73644		3667.03
S02	600.01	33.9892		1680.09	172.278		1240.05	140.808		2800.24	438.198		3700.43	588.919		0	19.1425		13372.4	1394.74		25713.3	2511.29		15.86	1.14321		1	0		202.748	33.9692		1664.13	172.282		1226	140.802		2768.11	438.196		3700.43	588.919		-3.02637e-06	19.1425		13372.1
S02	533.34	36.6028		240	226.363		120	158.649		300	466.065		1700.09	80.7217		0	8.51714		5067.48	214.299		8414.35	941.68		16.51	1.14321		1	0		135.635	36.6225		223.543	226.367		106.663	158.647		268.389	466.062		1700.09	80.7216		1.05879e-05	8.51714		5067.1
S02	600.01	35.4285		800.02	199.785		600.01	125.422		1300.05	387.993		1500.07	92.4197		0	8.77495		5667.69	329.14		11235.1	1019.99		20.28	1.14321		1	0		195.791	35.4388		783.096	199.787		586.359	125.426		1267.32	388.006		1500.05	92.4201		-4.00103e-05	8.77495		5667.38
S02	600.01	39.9588		240	346.853		200	275.084		500.01	883.621		0	22.6073		0	1.7314		266.67	43.9027		1853.36	1547.3		18.07	1.14321		1	0		192.289	50.7452		262.674	507.72		265.389	480.126		463.893	1529.42		-0.0229577	32.0954		0.000135722	2.09288		399.638
S02	566.675	36.4654		280	178.687		200	166.537		500.01	364.649		0	10.8375		0	0		66.67	18.038		1660.03	746.908		17.03	1.14321		1	0		199.896	80.7675		621.664	1133.26		504.51	948.295		1458.76	2363.97		0.0051354	37.587		-0.000472468	1.68483e-05		199.448
S02	633.345	43.7989		1040.03	316.635		900.025	381.289		2100.14	648.812		0	26.0959		0	0		66.67	35.1441		5173.59	1428.35		16.77	1.14321		1	0		250.764	85.5827		1281.64	1405.28		1024.38	1307.25		2262.04	3314.03		0.00968962	70.0844		-0.00876396	0.000513906		199.748
S02	600.01	33.3031		520.01	122.694		440.01	110.547		1100.04	273.436		700.02	55.1451		0	3.06433		1533.41	74.7501		5306.85	498.3		17.42	1.14321		1	0		174.505	33.3045		502.603	122.692		424.878	110.546		1066.12	273.408		699.974	55.1448		0.00221336	3.06433		1533.4
S02	733.35	36.9141		2560.2	135.56		2040.13	128.098		4850.73	286.142		1200.05	74.9779		0	8.99392		6067.84	338.775		18696.2	505.575		18.33	1.14321		1	0		310.125	36.9066		2543.06	135.557		2025.18	128.097		4818.6	286.146		1199.99	74.9786		-0.000577323	8.99392		6067.68
S02	533.34	39.4265		600.01	211.506		520.01	234.863		1250.05	492.261		0	25.8237		0	2.28481		333.34	117.237		3500.09	1092.45		15.99	1.14321		1	0		110.282	44.0841		623.233	306.116		545.352	336.861		1266.29	614.119		0.0103231	36.4855		0.000154119	2.9055		599.956
S02	533.34	34.438		600.01	147.731		480.01	108.645		1100.04	263.253		0	8.70096		0	0		66.67	20.463		2916.74	580.907		55.7699	1.14321		1	0		173.702	75.379		703.219	808.057		705.661	704.899		1565	1682.5		-0.00630489	55.6279		-4.23227e-05	8.93293e-07		199.961
S02	600.01	34.816		320	131.836		280	134.081		600.01	261.032		0	10.2173		0	0		0	12.676		1900.05	549.885		18.98	1.14321		1	0		376.158	113.453		382.2	1615.07		265.582	1363.55		613.717	3328.48		0.0168382	123.89		1.17113e-05	5.40662e-07		266.488
S02	600.01	34.0589		200	113.896		160	94.5088		400.01	193.314		0	12.9484		0	0		66.67	16.44		1603.35	429.863		17.94	1.14321		1	0		218.544	67.3816		221.682	707.351		145.64	599.11		362.671	1323.79		-0.0889207	37.688		-3.41911e-06	7.89958e-08		199.894
S02	633.345	33.4779		360	140.549		320	144.029		700.02	350.717		0	4.70871		0	0		66.67	13.8174		2160.05	672.321		22.62	1.14321		1	0		256.87	82.9068		302.322	1240.64		305.296	1086.25		662.453	2477.92		-0.250122	41.1377		2.42023e-06	5.21672e-08		133.36
S02	600.01	37.6876		840.02	251.168		720.02	181.788		1800.1	469.458		0	40.9356		0	0		200	75.201		4693.47	1028.76		23.14	1.14321		1	0		186.819	58.1115		863.17	586.178		704.333	502.064		1763.46	1181.39		199.765	63.5554		-7.04522e-06	3.59916		733.268
S02	600.01	39.6663		440.01	280.14		400	177.516		900.03	496.713		100	30.6678		0	0		666.68	38.2802		3360.09	919.09		20.8	1.14321		1	0		180.438	39.6847		423.261	280.143		383.913	177.516		865.663	496.688		99.9503	30.6666		2.42721e-05	3.56815e-07		666.635
S02	600.01	33.6696		320	171.647		240	160.918		700.02	400.411		0	19.1742		0	0		333.34	49.2618		2500.06	696.206		16.9	1.14321		1	0		175.64	37.0532		262.509	149.5		184.194	186.528		569.918	380.415		0.0121889	18.8415		-9.47901e-05	1.53317e-06		399.894
S02	666.68	36.7621		1040.03	181.839		960.03	152.863		2200.15	466.111		200	30.2621		0	1.94404		1200.05	124.92		6553.75	664.634		15.99	1.14321		1	0		240.251	37.8461		981.994	188.062		904.557	169.183		2071.6	397.21		200.006	30.7304		0.000342196	2.01407		1233.07
S02	600.01	34.4137		400	153.466		400	146.382		900.03	313.085		0	8.20945		0	0		0	15.4309		2186.71	620.131		20.54	1.14321		1	0		571.669	154.397		6503.05	1795.27		5985.84	1600.32		14125.9	3442.12		99.9738	84.2719		-0.000886223	5.39709e-05		533.04
S02	600.01	38.0651		480.01	161.608		360	159.087		800.02	359.078		800.02	104.855		0	7.18597		2600.22	514.098		5686.95	1186.21		18.33	1.14321		1	0		176.202	38.046		461.722	161.606		345.058	159.084		764.187	359.11		799.981	104.854		0.00484717	7.18596		2599.96
S02	600.01	35.2542		520.01	177.318		320	152.906		700.02	360.005		2200.15	216.296		0	16.9875		11470.9	1098.54		15651.5	2012.66		33.865	1.14074		1	0		204.343	35.2198		501.651	177.32		304.946	152.909		662.051	360.007		2200.17	216.296		-0.0255327	16.9877		11470.6
S02	666.68	33.9445		480.01	145.943		320	113.057		700.02	238.301		800.02	76.0541		0	8.04369		5000.8	343.072		8534.54	568.362		17.16	1.14321		1	0		247.353	33.9769		461.678	145.937		303.382	113.054		665.439	238.297		799.68	76.0539		0.00393416	8.04369		5000.14
S02	600.01	31.529		6241.21	290.722		440.01	132.752		500.01	347.912		59060.3	3250.03		2400.18	134.534		321523	15006.2		396669	17886.6		50.57	1.14321		1	0		165.215	31.5396		6224.09	290.726		424.474	132.743		466.917	347.902		59060	3250.03		2400.18	134.534		321523
S02	600.01	35.806		360	187.309		320	157.47		700.02	426.165		0	27.6066		0	0		133.33	65.6766		2296.71	898.918		20.15	1.14321		1	0		233.671	52.7527		423.731	593.021		345.847	402.934		1016.68	996.809		-0.280224	48.6674		0.000271177	3.38461e-06		333.208
S02	600.01	33.9567		320	145.404		280	118.463		700.02	299.92		0	8.54025		0	0		0	10.1965		1956.7	575.642		18.46	1.14321		1	0		106.307	228.093		5004.59	1718.07		3866.82	1469.97		11768	3452.35		199.88	65.8552		-7.60688e-05	7.94335e-08		266.65
S02	600.01	43.4244		640.01	299.894		560.01	267.294		1300.05	696.303		0	20.7938		0	0		0	11.0221		3253.47	1367.64		17.615	1.14074		1	0		649.319	204.12		9646.15	2918.41		9269.37	2472.26		20523.1	6103.83		250.022	160.386		6.78544e-06	1.71974e-06		199.719
S02	600.01	37.7103		640.01	171.086		520.01	148.553		1300.05	372.112		400.01	178.677		0	6.85156		2066.8	538.303		5513.54	1361.57		16.64	1.14321		1	0		254.339	37.6974		622.762	171.084		506.875	148.553		1258.74	372.102		399.964	178.678		7.14638e-05	6.85156		2066.23
S02	733.35	44.0587		4620.66	309.213		3440.37	277.328		8202.09	650.344		7301.69	488.59		200	31.8416		41454.6	2383.67		75077.1	3111.14		30.03	1.14321		1	0		323.573	44.0586		4603.9	309.212		3426.55	277.333		8164.83	650.328		7301.67	488.591		200	31.8416		41454
S02	600.01	37.3716		1160.04	193.946		520.01	160.073		1400.06	365.174		2300.17	209.227		100	23.3845		23818	1416.2		30258.2	2111.73		21.19	1.14321		1	0		188.614	37.3814		1143.74	193.943		504.767	160.08		1365.38	365.172		2300.18	209.227		100.001	23.3845		23817.6
S02	533.34	32.2757		380	101.356		280	117.02		700.02	202.063		200	37.248		0	2.96966		1533.41	108.489		3966.78	425.587		25.22	1.14321		1	0		118.643	32.2782		363.913	101.356		264.619	117.017		664.744	202.066		199.999	37.248		-0.00435387	2.96966		1533.33
S02	600.01	35.8427		720.02	234.837		440.01	194.939		900.03	463.854		1100.04	93.6482		0	14.0466		9836.42	509.041		15916.8	1081.86		21.84	1.14321		1	0		187.862	35.8258		703.999	234.837		425.692	194.931		863.836	463.862		1100.04	93.6482		-0.00355974	14.0466		9836.44
S02	600.01	36.0514		680.01	167.36		400	148.281		1000.03	339.32		1000.03	270.988		0	9.99989		7201.65	341.371		14363.1	897.484		18.395	1.14074		1	0		190.524	36.0512		663.261	167.368		386.233	148.28		964.542	339.305		1000.03	270.988		-0.00295942	9.99987		7201.69
S02	600.01	39.4775		520.01	207.562		400	169.943		1100.04	376.872		300	45.3763		0	2.96339		2266.83	98.4866		5413.6	838.288		23.79	1.14321		1	0		190.252	39.477		502.722	207.562		386.222	169.943		1066.11	376.87		299.999	45.3763		-0.00448976	2.96339		2266.72
S02	533.34	33.9592		480.01	178.196		360	167.734		800.02	333.898		700.02	61.4322		0	4.20257		2600.22	158.406		5726.98	859.37		25.74	1.14321		1	0		124.243	33.9556		462.519	178.198		345.835	167.739		817.477	333.888		700.024	61.4322		0.000965105	4.20257		2599.71
S02	600.01	35.1718		1120.04	232.447		740.02	164.997		1400.06	425.849		2900.27	191.647		0	15.0838		10069.9	682.669		25023.8	1330.76		23.14	1.14321		1	0		195.139	35.1536		1101.81	232.455		744.77	165.008		1367.94	425.852		2900.26	191.647		-0.000245129	15.0838		10069.4
S02	533.34	37.7192		320	138.311		240	117.312		600.01	277.993		0	6.88031		0	0		0	20.059		1840.02	565.83		19.37	1.14321		1	0		405.248	159.222		6102.51	1389.97		5105.13	1191.58		11271.3	3587.8		199.988	106.269		7.0839e-05	1.74219e-07		633.202
S02	600.01	39.0557		680.01	168.348		560.01	153.939		1300.05	338.626		0	6.63477		0	0		200	24.655		3400.11	685.019		17.94	1.14321		1	0		310.143	65.6653		663.695	558.328		625.284	469.654		1663.12	1015		0.0105129	21.3253		-1.31168e-06	2.34696e-08		266.304
S02	566.675	34.8968		240	215.719		200	209.634		500.01	455.776		0	9.32303		0	0		0	12.1658		1533.36	810.345		23.92	1.14321		1	0		402.654	226.971		6185.42	2803.27		4585.69	2186.36		12016.3	5529.02		150.016	103.119		3.58612e-07	7.62599e-09		266.446
S02	600.01	37.34		600.01	211.201		560.01	199.669		1500.07	467.83		0	9.78148		0	0		333.34	43.4663		3693.43	939.475		22.23	1.14321		1	0		172.388	42.9367		664.515	307.395		625.887	300.064		1561.62	588.697		-0.0777232	10.9847		-9.77263e-08	1.6369e-09		399.949
S02	533.34	38.8146		280	124.106		180	122.715		500.01	342.002		500.01	49.2212		0	3.2195		2000.13	153.34		4033.48	665.254		17.16	1.14321		1	0		113.885	38.8064		263.997	124.112		167.397	122.707		463.532	341.985		499.825	49.2213		2.54513e-08	3.2195		2000.03
S02	533.34	35.5924		440.01	205.087		400	194.599		900.03	448.183		0	11.6436		0	0		200	23.0658		2583.38	812.853		18.98	1.14321		1	0		179.501	55.1782		503.64	593.016		467.611	504.62		1065.95	926.951		-0.0802498	21.7311		-7.19511e-09	1.30201e-10		266.437
S02	666.68	38.2471		1600.08	189.159		1400.06	163.352		3300.34	409.78		0	12.3984		0	2.62398		666.68	289.615		10240.8	807.123		19.11	1.14321		1	0		241.487	38.9767		1583.76	191.913		1386.35	163.724		3266.46	413.737		0.0146557	12.6053		1.8137e-09	2.70677		799.922
S02	600.01	32.2552		560.01	201.528		400	167.908		1000.03	480.966		800.02	96.9071		0	10.8071		5901.1	519.19		9394.37	1445.68		15.99	1.14321		1	0		176.351	32.2434		543.481	201.53		385.376	167.91		965.423	480.965		800.016	96.9071		-3.05182e-10	10.8071		5901.07
S02	600.01	37.9001		320	232.512		300	240.151		800.02	524.952		0	17.7284		0	2.72367		200	228.803		2120.05	1204.77		18.07	1.14321		1	0		180.817	49.375		503.703	496.355		465.345	475.498		1164.69	974.711		0.00113422	29.809		-4.42705e-10	4.23508		1666.7
S02	600.01	39.0729		1120.04	208.154		1080.04	157.689		2300.16	375.241		0	20.6594		0	0		66.67	14.2427		5320.25	745.725		22.88	1.14321		1	0		249.839	108.564		2064.57	1048.97		1744.83	995.155		4263.33	2440.48		99.9994	74.3644		2.10426e-09	7.55181e-11		200.008
S02	600.01	40.8394		1360.06	276.961		860.02	228.195		2200.15	571.249		2900.27	225.79		100	18.6451		17142.7	1245.13		27940.9	2150.55		16.25	1.14321		1	0		251.931	40.8421		1345.09	276.963		843.858	228.194		2162.19	571.248		2900.27	225.79		100	18.6451		17142.7
S02	600.01	38.2005		760.02	246.578		240	239.76		500.01	516.613		4200.56	179.002		100	21.4674		21147.6	756.949		30503.1	1234.96		21.45	1.14321		1	0		185.568	38.2031		744.972	246.58		224.307	239.754		461.898	516.613		4200.56	179.002		100	21.4674		21147.5
S02	533.34	31.5783		240	124.397		200	104.987		500.01	296.336		0	14.9095		0	0		0	94.8592		1636.69	643.97		17.16	1.14321		1	0		185.377	58.4002		444.565	661.013		305.273	529.039		862.786	1386.62		-0.00560242	65.149		-9.59591e-08	4.43882		466.484
S02	600.01	34.7905		320	120.08		280	110.933		700.02	268.398		0	4.69051		0	0		0	9.12194		1840.03	497.67		17.29	1.14321		1	0		353.855	195.883		5985.32	2290.23		4226.3	2079.38		12169.6	4881.89		300.002	103.395		3.4246e-07	2.12637e-08		133.046
S02	533.34	35.6255		320	225.837		240	203.242		600.01	469.509		0	29.0414		0	0		133.33	85.4352		2306.7	918.823		33.67	1.14321		1	0		126.604	55.6063		224.227	491.391		185.72	419.42		466.669	950.473		199.998	51.7418		-1.87085e-06	2.44887		399.698
S02	600.01	35.5358		320	123.022		280	102.824		700.02	234.31		0	11.8583		0	0		0	44.5223		1966.7	533.551		17.03	1.14321		1	0		144.667	77.5579		1023.09	881.488		785.058	800.312		1667.17	1751.35		0.00706034	51.0178		4.90202e-06	1.72058e-07		733.238
S02	566.675	33.8979		360	137.119		280	132.491		700.02	349.894		0	18.79		0	0		600.01	53.9195		2980.06	581.875		18.46	1.14321		1	0		164.737	33.9528		340.432	137.111		264.466	132.483		664.577	349.876		-0.0154186	18.7901		-0.000316897	5.48777e-06		599.9
S02	733.35	41.8962		2840.25	202.225		2360.17	231.487		5701.01	383.959		100	26.5746		0	2.57339		666.68	61.0613		12714.6	712.725		17.16	1.14321		1	0		320.717	42.4805		2821.25	206.471		2345.69	236.28		5666.19	391.622		99.9603	27.0606		0.00128538	2.62975		666.767
S02	533.34	32.1968		200	103.959		160	129.505		400.01	247.685		300	61.6557		0	6.35421		1466.74	260.001		3006.76	687.001		35.49	1.14321		1	0		112.832	33.2132		218.805	121.479		145.731	142.048		362.532	256.04		350.024	63.1552		-0.00581325	6.52933		2333.62
S02	533.34	32.2601		160	96.8773		120	81.0415		300	258.407		0	6.43686		0	0		66.67	18.9499		1306.69	382.474		16.64	1.14321		1	0		232.622	71.1259		256.193	765.248		224.031	624.332		659.634	1595.86		-0.0486494	24.3502		-0.00710583	0.000372578		233.042
S02	533.34	35.072		2080.13	123.493		160	99.5283		200	244.97		12104.6	269.436		700.02	46.0212		102668	926.205		118572	888.798		19.045	1.14074		1	0		101.564	35.0665		2057.27	123.48		143.877	99.5185		162.13	244.936		12104.6	269.437		700.024	46.0212		102667
S02	600.01	33.6907		680.01	116.161		320	110.216		700.02	261.385		2800.25	157.64		100	17.1526		16441.9	783.726		23988.9	1148.88		17.875	1.14074		1	0		176.795	33.6713		660.017	116.134		305.553	110.209		665.952	261.382		2800.26	157.64		99.9869	17.1527		16440.9
S02	600.01	37.354		240	205.237		200	187.877		400.01	349.2		0	11.3527		0	0		66.67	70.0848		1606.68	784.811		16.705	1.14074		1	0		251.43	64.5579		621.888	785.09		425.549	721.249		1265.59	1770.93		-0.005927	35.5431		-0.0123655	0.000393961		565.743
S02	533.34	31.509		400	152.048		320	109.549		750.02	295.661		600.01	95.7269		0	7.92288		4133.88	551.203		8667.54	1053.01		17.55	1.14321		1	0		120.468	34.1244		462.738	187.103		345.283	128.642		965.554	369.096		800.033	102.265		0.00141512	10.9369		5600.41
S02	533.34	34.7161		480.01	142.289		240	137.208		400.01	319.121		2400.18	113.569		0	17.1159		16275.1	598.551		20261.4	1077.7		20.15	1.14321		1	0		123.268	34.7162		462.75	142.294		225.342	137.209		367.236	319.106		2400.1	113.571		-0.00137611	17.1159		16274.9
S02	733.35	38.3795		2980.28	213.408		2480.19	238.777		6201.2	443.312		700.02	73.858		0	7.38877		2500.2	296.779		15061.7	1026.76		29.38	1.14321		1	0		327.553	38.3779		2962.05	213.406		2465.21	238.777		6170.26	443.312		699.84	73.8581		0.000349467	7.38877		2500.21
S02	466.67	34.8872		360	127.694		280	147.714		750.02	277.247		0	16.7955		0	0		266.67	33.1006		2386.71	540.433		19.11	1.14321		1	0		60.4738	43.4246		340.991	248.649		264.497	216.171		768.009	411.931		-0.0632352	21.1819		-8.78767e-05	2.08032		266.639
S02	733.35	39.1457		4200.55	275.9		3420.36	303.852		8802.41	581.514		600.01	50.4552		0	8.04165		4500.65	302.599		23155.2	1235.77		24.7	1.14321		1	0		314.392	39.1871		4181.7	275.897		3403.92	303.861		8767.3	581.537		600.026	50.4552		2.40365e-05	8.04165		4500.67
S02	533.34	38.4109		160	294.632		160	232.664		300	532.267		0	12.735		0	0		133.33	28.9472		1296.68	1183.43		26.91	1.14321		1	0		173.379	85.3454		361.213	1286.02		302.955	1006.7		563.168	2381.96		-0.0122129	44.8919		-4.46404e-06	2.07172e-07		266.594
S02	600.01	31.7098		560.01	152.167		480.01	142.393		1000.03	317.572		0	88.6523		0	2.89969		266.67	606.46		2460.04	1209.46		20.15	1.14321		1	0		180.924	38.4585		941.725	236.649		743.903	197.191		1864.27	442.01		200.012	113.608		-3.09264e-07	8.88868		1399.84
S02	600.01	33.2873		400	126.229		320	120.079		700.02	255.321		500.01	74.6174		0	2.84993		600.01	253.633		3286.72	762.81		19.76	1.14321		1	0		206.834	33.488		382.683	127.268		304.478	121.088		664.511	257.397		499.944	75.025		1.60487e-07	2.8746		599.982
S02	866.69	51.011		6741.41	471.607		5560.96	412.826		14206.3	1029.61		400.01	32.4881		0	0		466.67	44.6294		28008.5	1920.51		24.7	1.14321		1	0		529.749	54.78		7344.47	515.754		6524.48	453.146		15519	1122.74		400.024	34.1995		-2.09752e-06	6.39568e-08		533.224
S02	533.34	32.44		880.02	135.837		720.02	100.5		1800.1	438.277		300	36.8353		0	3.14373		1933.45	126.792		6373.67	892.26		21.32	1.14321		1	0		114.662	32.4553		862.343	135.841		704.262	100.495		1766.47	438.259		299.993	36.8353		1.12246e-05	3.14373		1933.41
S02	533.34	30.7823		240	103.772		240	71.1311		500.01	228.028		100	26.1092		0	1.73894		400.01	56.4733		1880.03	478.726		18.2	1.14321		1	0		110.287	40.0148		302.026	173.919		285.117	149.102		667.642	389.387		200.009	34.1313		-3.64269e-05	2.62225		666.339
S02	533.34	32.8091		280	110.971		200	96.3141		500.01	279.809		300	35.4559		0	3.50748		2133.48	113.701		4213.55	488.266		17.875	1.14074		1	0		118.119	32.7944		262.513	110.967		185.567	96.3126		467.879	279.808		299.959	35.4563		0.000164368	3.50748		2133.03
S02	666.68	37.9922		2340.17	361.067		1920.11	297.176		4500.63	578.152		300	40.5913		0	2.86829		2400.18	111.042		12431.1	1128.06		21.45	1.14321		1	0		252.289	37.9993		2323.28	361.064		1905.57	297.177		4468.23	578.155		299.961	40.5911		-0.000580275	2.86829		2400.04
S02	533.34	34.0061		1160.04	241.653		920.03	205.891		1200.04	512.746		9803.04	332.141		0	15.0963		11204	629.159		27410.6	748.197		18.07	1.14321		1	0		114.318	33.9829		1143.38	241.651		905.037	205.887		1166.09	512.731		9803.05	332.141		0.00219303	15.0963		11204
S02	800.02	45.677		6881.47	292.966		5480.93	233.316		13505.7	520.228		5200.86	308.281		0	24.1965		18544.3	1791.74		54610.9	2316.98		20.93	1.14321		1	0		377.734	45.6759		6864.37	292.967		5465.33	233.317		13469.8	520.231		5200.85	308.281		-0.00614568	24.1965		18544.2
S02	466.67	36.3261		600.01	143.048		400	115.885		900.03	276.728		400.01	180.911		0	8.33462		1333.39	915.762		6136.94	1143.54		24.7	1.14321		1	0		54.472	36.2853		583.158	143.043		384.616	115.879		863.741	276.733		400.02	180.911		-0.0111817	8.33473		1333.33
S02	933.36	58.1657		6001.12	532.314		5080.8	511.466		12504.9	1543.72		1600.08	166.772		0	3.6228		1666.76	202.04		28207	2884.02		17.485	1.14074		1	0		531.272	58.1842		5985.38	532.317		5066.14	511.468		12468.1	1543.72		1600.02	166.77		0.00227363	3.6228		1666.73
S02	666.68	44.0202		1240.05	389.684		1160.04	351.633		2600.21	980.137		100	24.3956		0	0		533.34	44.0837		6333.65	1652.88		22.49	1.14321		1	0		269.755	45.4559		1225.35	411.753		1145.42	387.461		2665.54	1204.36		99.8434	25.5098		-0.000585074	7.63898e-06		533.285
S02	600.01	35.078		1120.04	246.19		720.02	177.997		1850.11	534.658		6001.14	189.848		100	16.8462		16975.8	469.465		27750.2	1379.6		18.98	1.14321		1	0		196.915	35.0972		1104.41	246.205		704.546	178.003		1817.91	534.646		6001.06	189.847		100	16.8462		16975.8
S02	1066.7	52.9579		8082.03	504.603		6681.39	479.208		15707.7	1122.23		4500.64	128.35		0	17.6709		17209.4	397.664		55780.4	2335.52		26	1.14321		1	0		660.614	52.9543		8065.21	504.61		6665.55	479.211		15675	1122.24		4500.65	128.35		-3.2241e-05	17.6709		17209.4
S02	800.02	46.052		4360.59	279.838		3620.41	411.576		8452.23	599.42		4200.56	225.736		0	10.9933		10203.3	512.242		33761.3	1722.76		16.9	1.14321		1	0		394.648	46.0532		4343.13	279.846		3604.15	411.58		8418.91	599.416		4200.56	225.736		1.27771e-05	10.9933		10203.3
S02	933.36	47.1617		5440.92	330.178		4600.66	276.673		11304	635.237		3100.3	229.129		0	10.2809		6601.39	527.583		31926.5	1710.99		19.89	1.14321		1	0		529.415	47.1489		5422.66	330.183		4584.39	276.67		11271.2	635.237		3100.3	229.129		-1.08031e-05	10.2809		6601.32
S02	600.01	33.9349		280	195.262		200	163.225		400.01	360.369		800.02	55.115		0	2.95098		2133.48	91.3914		4760.2	784.088		29.38	1.14321		1	0		205.391	33.8982		261.089	195.266		184.336	163.222		366.265	360.383		800.024	55.115		3.02787e-05	2.95098		2133.43
S02	1200.04	52.9177		9402.75	578.023		8202.09	488.372		19612	1212.37		2700.23	213.641		0	13.6623		8202.14	700.73		50037	3043.14		28.08	1.14321		1	0		790.952	52.9777		9386.06	578.009		8187.07	488.372		19580.3	1212.34		2700.24	213.641		-0.00153243	13.6623		8201.98
S02	933.36	202.044		6241.21	3343.9		4940.76	2775.13		11904.4	6209.94		7501.78	530.901		200	27.6286		28559.3	1429.7		58973.3	13254.4		19.24	1.14321		1	0		519.909	202.045		6225.73	3343.89		4925.5	2775.13		11874.4	6209.94		7501.78	530.901		200.004	27.6286		28559.2
S02	600.01	33.9695		320	170.582		240	146.142		500.01	577.678		600.01	71.1273		0	4.88512		2600.22	268.985		4420.15	1196.88		16.51	1.14321		1	0		190.022	34.4327		305.197	145.251		224.742	149.896		468.624	592.463		600.01	71.8349		-0.0279824	5.01073		2733.38
S02	666.68	36.3489		680.01	205.922		520.01	177.513		1300.05	306.805		0	28.8406		0	0		200	61.8914		3766.76	566.474		19.63	1.14321		1	0		265.02	46.2821		745.448	371.241		625.059	294.363		1366.03	522.215		99.9999	44.8674		-0.0714289	7.73637e-05		266.632
S02	600.01	33.3961		280	161.568		200	141.138		400.01	448.196		800.02	48.0599		0	5.80806		2933.61	84.2796		5553.65	748.229		20.085	1.14074		1	0		209.027	33.3889		264.505	161.577		185.315	141.138		362.99	448.202		800.02	48.0599		-0.0282675	5.80801		2933.58
S02	600.01	39.4961		680.01	190.397		200	224.081		500.01	524.03		6801.47	177.147		100	20.9417		24485.7	618.711		34009.3	1263.95		16.64	1.14321		1	0		207.689	39.5049		662.589	190.409		185.184	224.083		463.669	524.014		6801.47	177.147		100.006	20.9417		24485.7
S02	666.68	33.6052		480.01	187.871		400	138.251		900.03	320.619		1700.09	79.5667		0	6.94831		3066.97	252.291		7403.9	829.053		20.28	1.14321		1	0		267.034	33.6215		461.361	187.877		384.826	138.253		866.274	320.607		1700.09	79.5667		-0.0013403	6.94831		3066.98
S02	1266.72	273.598		11844.4	3936.3		10123.2	3309.42		23917.8	7736.58		33535.6	2694.53		200	26.9867		21548.1	2437.33		103291	19579.7		16.25	1.14321		1	0		865.535	273.6		11825.6	3936.3		10107.7	3309.42		23884.7	7736.59		33535.6	2694.53		200	26.9867		21548.1
S02	566.675	36.0106		240	353.066		200	337.003		400.01	603.365		200	65.174		0	3.05798		800.02	120.107		2926.74	1513.19		17.42	1.14321		1	0		196.798	36.0175		222.677	353.057		224.258	337.003		365	603.382		200	65.174		0.00165516	3.05797		800.018
S02	666.68	40.922		3360.35	304.244		2800.24	262.093		6401.28	597.32		400.01	87.0633		0	0		400.01	52.5575		14929	1284.21		15.86	1.14321		1	0		262.813	41.5988		3344.2	309.968		2784.96	266.626		6364.23	607.984		400.01	88.3883		-0.0105379	0.00031728		400.026
S02	566.675	33.7962		400	214.978		160	174.259		500.01	464.105		3300.34	221.168		0	13.4364		8569	534.014		17624.9	1113.29		25.74	1.14321		1	0		164.172	33.7948		384.44	214.976		145.834	174.252		462.865	464.093		3300.34	221.168		-0.0106859	13.4364		8568.91
S02	933.36	56.4957		6241.21	514.318		4800.72	472.118		11504.1	1246.58		7901.98	199.013		300	27.8675		36809.7	856.406		69696.9	2341.84		20.02	1.14321		1	0		529.336	56.5051		6225.42	514.319		4787.2	472.116		11469.4	1246.57		7901.98	199.013		300.002	27.8675		36809.5
S02	666.68	38.9708		1800.1	217.23		1560.08	177.282		3700.43	425.206		100	25.6476		0	0		333.34	69.1688		8714.26	861.141		21.06	1.14321		1	0		262.357	43.2882		1823.76	274.078		1566.48	243.233		3667.73	476.619		200	30.6386		-0.00118669	7.46765e-06		333.27
S02	1400.06	95.6872		17649.7	1442.67		15447.4	1271.21		36240.8	3080.3		1100.04	95.7018		0	12.3076		6868.17	694.672		79279.5	5541.4		17.03	1.14321		1	0		1002.9	95.7373		17633	1442.67		15433.5	1271.21		36208	3080.29		1100.04	95.7019		0.00260324	12.3076		6868.21
S02	600.01	35.6301		280	190.241		220	163.955		500.01	329.591		1300.05	69.876		0	2.96966		1000.03	51.9657		4620.19	626.285		16.12	1.14321		1	0		216.459	35.611		263.308	190.242		225.284	163.965		513.848	329.625		1300.05	69.876		-0.0105558	2.96965		1066.52
S02	600.01	35.3951		560.01	210.307		480.01	155.255		1300.05	414.144		0	24.2054		0	0		266.67	27.6094		3400.08	864.916		19.11	1.14321		1	0		201.741	42.6723		542.64	330.886		542.79	271.919		1362.18	708.58		0.00310198	31.323		-0.000602022	1.06259e-05		333.166
S02	533.34	31.9032		120	137.228		120	118.173		200	279.437		0	146.191		0	6.14962		200	812.291		1326.68	1495.32		20.28	1.14321		1	0		192.716	37.7369		103.161	218.186		104.613	184.343		165.331	472.873		100.009	193.144		0.000167352	8.11594		333.3
S02	666.68	54.1142		1260.05	748.481		1120.04	938.243		2800.24	1209.07		700.02	56.5376		0	2.14344		1600.08	58.0045		8520.51	2515.64		18.59	1.14321		1	0		255.782	54.1448		1243.42	748.478		1105.85	938.239		2767.48	1209.06		699.957	56.5383		-4.31171e-05	2.14344		1599.92
S02	1066.7	63.3469		12244.7	826.517		10163.2	678.602		24418.5	1719.76		4800.73	168.292		200	22.038		25554.1	830.235		85072.5	3498.01		19.5	1.14321		1	0		654.099	63.3337		12228.4	826.511		10149.1	678.603		24385.1	1719.78		4800.68	168.292		200	22.038		25554
S02	866.69	40.3126		5440.92	311.46		4200.55	282.121		10203.2	599.659		5600.99	252.93		200	24.5939		32233	740.643		58611.2	1706.72		22.88	1.14321		1	0		455.872	40.3011		5425.74	311.454		4186.04	282.125		10167.6	599.667		5601.01	252.93		200	24.5939		32232.9
S02	1066.7	146.197		5040.79	2867.78		2960.27	2720.77		6451.3	5680.24		26321.9	789.897		700.02	47.7133		99581.2	2915.3		158102	11951		21.84	1.14321		1	0		665.006	146.172		5025.86	2867.78		2944.9	2720.77		6415.12	5680.24		26321.9	789.897		700.02	47.7133		99580.9
S02	933.36	47.4556		8342.16	571.357		4560.65	366.328		10403.4	851.78		44362.3	1465.14		1400.06	78.2079		205266	5631.7		282513	8205.54		16.77	1.14321		1	0		545.567	47.4041		8325.61	571.374		4545.17	366.323		10367.7	851.77		44362.2	1465.14		1400.06	78.2079		205265
S02	1333.39	133.607		13986.1	2254.45		10083.2	1929.45		22165.3	4787.16		19011.4	273.939		500.01	36.9407		79802.2	703.774		132264	9364.34		24.44	1.14321		1	0		950	133.605		13968.8	2254.45		10068.3	1929.45		22130.8	4787.17		19011.4	273.939		500.01	36.9407		79801.9
S02	733.35	44.592		2920.26	447.659		2560.2	382.294		6051.14	1078.49		200	39.5053		0	2.83788		1200.05	82.7324		14375.2	2011.04		22.1	1.14321		1	0		349.582	44.5927		2903.56	447.662		2546.03	382.294		6018.48	1078.5		200.003	39.5053		7.18277e-06	2.83788		1200.01
S02	533.34	35.3352		320	210.74		280	166.084		700.02	474.887		0	61.7437		0	3.43955		266.67	315.839		2213.39	1213.43		18.33	1.14321		1	0		149.758	42.5957		543.846	295.205		425.826	251.726		918.324	602.429		99.969	75.4722		7.31382e-05	8.04873		533.334
S02	733.35	74.0651		2400.18	1048.64		2160.15	1013.9		5250.85	2402.99		100	47.0669		0	2.83212		400.01	133.365		10981.2	4928.84		16.575	1.14074		1	0		344.024	83.0748		2523.84	1452.09		2265.08	1151.83		5569.08	3301.29		99.8407	52.878		-0.000559399	3.23183		466.693
S02	733.35	50.9601		2920.26	661.863		2560.2	569.933		6051.14	1372.8		200	28.028		0	0		466.67	60.6266		12882	2780.34		21.19	1.14321		1	0		400.48	53.5294		3043.44	703.422		2644.38	605.959		6368.84	1460.84		199.901	32.2228		0.00216734	3.47222e-05		466.588
S02	1400.06	70.1715		16568.5	758.609		13385.6	683.194		33334.6	1610.66		3600.41	126.425		100	18.814		24886.4	778.821		89555.4	3182.29		17.03	1.14321		1	0		989.718	70.1703		16551.4	758.61		13370.1	683.196		33300.4	1610.66		3600.44	126.425		99.9927	18.814		24886
S02	733.35	44.7647		2340.17	502.078		1420.06	370.052		4150.53	889.51		5000.79	525.379		200	40.7058		32967.9	4460.99		48491.2	6572.67		16.575	1.14074		1	0		323.06	44.7037		2323.11	502.079		1406.08	370.04		4115.07	889.522		5000.68	525.382		199.993	40.7057		32967.5
S02	733.35	54.7043		2800.24	643.007		2240.16	542.066		5500.94	1263.71		1600.08	103.112		0	13.3224		7535.14	417.322		19784	2817.43		20.67	1.14321		1	0		341.447	54.7334		2782.42	643.005		2226.91	542.066		5463.91	1263.7		1599.76	103.112		0.00224451	13.3224		7535.04
S02	933.36	112.208		8001.99	1601.9		6701.4	1724.6		16208.2	3520.71		4500.64	194.106		100	23.3425		28793	1200.07		72791.6	7410.82		18.85	1.14321		1	0		540.837	112.274		7986.87	1601.89		6684.07	1724.6		16174.2	3520.69		4500.55	194.104		100	23.3425		28792.6
S02	800.02	384.753		2560.2	6721.28		2120.14	5570.72		5000.78	14694.5		3000.28	333.074		100	20.3591		12271.5	1850.01		21621.5	26848.3		19.63	1.14321		1	0		398.791	384.79		2544.73	6721.29		2103.6	5570.71		4968.97	14694.4		3000.31	333.074		100	20.3591		12271.3
S02	666.68	45.523		1720.09	429.217		1280.05	375.495		2950.27	929.449		4150.55	130.296		0	17.2021		16675.5	636.555		26233.7	2355.03		18.005	1.14074		1	0		264.725	45.5056		1703.66	429.225		1264.45	375.489		2917.98	929.466		4150.54	130.296		-2.17774e-06	17.2021		16675.5
S02	600.01	35.7162		1880.11	218.961		960.03	219.313		2100.14	443.856		8402.24	307.357		300	30.7777		46669.2	1428.59		65987.4	1213.3		25.61	1.14321		1	0		201.568	35.6996		1863.56	218.958		944.685	219.312		2065.73	443.875		8402.24	307.357		300	30.7777		46669.2
S02	800.02	54.935		4600.66	588.07		4040.51	549.064		9602.87	2066.26		2500.2	110.824		0	8.91993		5734.38	283.184		28198.9	2486.68		18.46	1.14321		1	0		404.199	54.927		4584.13	588.072		4025.64	549.058		9567.31	2066.27		2500.2	110.824		4.81586e-07	8.91993		5734.31
S02	600.01	40.2563		1520.07	259.888		1240.05	223.568		3200.32	859.58		800.02	50.0277		0	6.52659		2133.48	103.148		9787.41	1393.57		19.24	1.14321		1	0		203.606	40.2608		1503.61	259.884		1225.73	223.566		3164.8	859.574		800.02	50.0277		-2.60994e-06	6.52659		2133.28
S02	466.67	33.529		360	166.971		240	171.58		600.01	362.003		300	42.5986		0	2.44748		933.36	143.713		3083.41	868.588		18.2	1.14321		1	0		68.8433	34.2788		343.868	188.062		264.997	175.749		565.624	370.871		300	43.4056		1.02957e-05	2.51267		933.135
S02	533.34	35.0219		880.02	153.522		720.02	192.338		1700.09	396.588		500.01	90.0999		0	3.69717		1400.06	346.173		5990.26	948.455		16.38	1.14321		1	0		131.754	35.035		863.738	153.523		704.061	192.343		1665.77	396.592		500.01	90.0999		-3.86182e-05	3.69717		1399.8
S02	466.67	30.7391		560.01	155.45		240	115.008		550.01	296.871		2700.23	406.407		0	18.2659		8669.06	1656.54		21884	2241.36		25.22	1.14321		1	0		58.5438	30.7476		543.432	155.452		223.892	115.006		564.881	296.873		2700.23	406.407		0.000147924	18.2659		8668.92
S02	600.01	37.0149		2160.14	176.951		1920.11	152.984		4800.72	330.606		100	19.0589		0	2.86221		1400.06	55.7065		10770.9	678.53		23.465	1.14074		1	0		189.031	37.0172		2143.38	176.951		1904.76	152.976		4765.07	330.611		99.9943	19.0589		-0.000529908	2.86221		1400.1
S02	466.67	32.2085		320	208.746		120	170.811		300	452.251		100	143.404		0	10.6376		533.34	1033.5		2833.39	1358.68		19.5	1.14321		1	0		60.7522	33.0432		303.589	217.874		105.798	196.455		264.571	472.404		100.02	151.289		0.00189123	11.0484		533.232
S02	533.34	34.5746		1760.1	163.247		400	118.093		800.02	387.98		10303.4	271.493		500.01	37.2381		77423.6	1575.66		92537.5	2144.96		17.03	1.14321		1	0		136.858	34.5559		1743.98	163.246		386.441	118.091		766.935	387.966		10303.2	271.492		500.001	37.2381		77423.4
S02	466.67	33.5763		240	149.296		200	137.177		500.01	354.907		100	28.1092		0	2.60679		1066.7	113.518		2693.39	750.906		16.9	1.14321		1	0		76.1823	33.8187		223.695	150.545		186.714	138.397		469.394	357.807		99.6787	28.3492		-0.0088778	2.62962		1066.68
S02	566.675	35.7961		1900.11	180.166		960.03	146.728		2400.18	333.781		3550.4	1046.77		200	53.6744		23951.6	6254.1		34965.7	7231.67		19.63	1.14321		1	0		175.347	35.7981		1883.33	180.167		946.292	146.735		2369.59	333.793		3550.09	1046.77		199.999	53.6743		23951.3
S02	500.005	34.8932		1240.05	154.041		400	156.834		900.03	371.876		4500.64	198.676		200	26.8387		36074.7	1124.48		48278.2	1589.64		19.37	1.14321		1	0		116.12	34.8614		1222.58	154.047		385.085	156.843		864.439	371.921		4500.52	198.675		199.997	26.8386		36073.8
S02	466.67	34.0815		680.01	159.337		320	188.729		700.02	332.564		2000.13	166.706		0	13.5742		12004.6	1053.71		19927	1578.03		16.25	1.14321		1	0		62.6532	34.1412		661.409	159.333		306.191	188.717		662.666	332.536		2000.15	166.706		0.000658959	13.5742		12004.2
S02	533.34	34.435		440.01	225.738		360	223.204		700.02	468.638		300	40.9647		0	2.44221		1866.78	160.263		4573.55	877.051		17.68	1.14321		1	0		124.302	34.9826		381.097	229.764		347.24	227.111		665.178	477.008		249.889	41.5592		-0.00233922	2.4851		1933.54
[truncated: 65 more columns]

## Sheet: S02Fully propagated clean data
Primary reference material	Iolite DRS	LA Settings
WC1	X_U_Pb_Geochron4 with total beam as index channel with a 20000 threshold cutoff and ignoring 235	100um, 10Hz, 30sec, fluence 5 J/cm2
	Tera-Wasserberg plot
Sample	238U/206Pb	2SE Propogated with Ref material uncertenties added in quadrature	207Pb/206Pb	2SE Propogated with Ref material uncertenties added in quadrature	Rho
S02	3.67206	1.28139	0.559295	0.454592	0.217865
S02	18.6527	2.33205	0.362441	0.261415	-0.0004156
S02	0.969802	0.293082	0.594229	0.439242	0.564221
S02	2.84964	0.763784	0.550233	0.440294	0.546368
S02	2.50342	0.850747	0.560607	0.4845	0.706066
S02	28.2701	4.23344	0.272047	0.22828	0.168673
S02	11.4667	1.40544	0.548221	0.37253	-0.0061997
S02	1.57472	0.334743	0.626123	0.447856	0.779075
S02	12.8417	1.74646	0.499504	0.342224	-0.288714
S02	4.13225	0.478251	0.64033	0.435605	-0.0972257
S02	6.42383	1.44305	0.490448	0.462714	0.685508
S02	2.90714	0.406627	0.651621	0.443186	-0.155615
S02	4.6268	2.17393	0.500683	0.390499	0.133984
S02	19.8287	2.21148	0.434916	0.301337	-0.025028
S02	14.2635	1.55459	0.537253	0.363941	-0.421698
S02	4.09423	0.484513	0.663627	0.461168	-0.0097598
S02	5.17455	0.724643	0.66843	0.46069	-0.109168
S02	19.5619	2.28133	0.378076	0.281086	-0.162503
S02	1.44088	0.533464	0.659512	0.548604	0.417816
S02	6.5307	1.59503	0.568317	0.398455	-0.129001
S02	2.24618	0.250538	0.716946	0.486674	0.0324978
S02	29.515	2.94292	0.311868	0.22949	-0.059036
S02	21.8612	2.52455	0.418741	0.286519	-0.568119
S02	20.6318	2.17142	0.47024	0.326326	-0.466467
S02	5.06434	0.732793	0.702439	0.474242	-0.526995
S02	12.604	2.16561	0.517351	0.358126	-0.275029
S02	22.2667	2.54149	0.386834	0.280676	0.171981
S02	1.71796	0.2208	0.757944	0.515266	-0.0470275
S02	16.5964	2.18901	0.504517	0.355396	-0.127199
S02	3.57841	0.41319	0.731374	0.499448	-0.007945
S02	2.94418	2.54	0.569614	0.405158	-0.264299
S02	6.03989	0.740831	0.707997	0.48144	-0.241896
S02	8.01065	1.36129	0.660433	0.452549	0.130263
S02	1.28021	0.257099	0.779423	0.529241	-0.288478
S02	23.5973	3.26376	0.412098	0.336242	0.194179
S02	14.6025	1.65284	0.585225	0.403336	-0.0486001
S02	5.22254	0.628884	0.737534	0.505384	0.180213
S02	2.52377	0.867056	0.663067	0.532358	0.82052
S02	5.44056	0.618448	0.739509	0.507584	0.0187044
S02	8.01194	0.880266	0.725729	0.494308	0.102024
S02	12.0001	1.39032	0.641052	0.436169	-0.152672
S02	1.59788	0.172556	0.801687	0.547454	0.0530088
S02	13.1988	1.63181	0.572231	0.40096	-0.0028492
S02	2.26969	0.415499	0.794849	0.563063	0.402396
S02	4.63716	0.635982	0.746914	0.508778	0.180215
S02	2.69265	0.345735	0.804609	0.544513	-0.197243
S02	8.5938	1.30584	0.713755	0.501608	0.359404
S02	1.57203	0.43374	0.742802	0.640496	0.568845
S02	3.53163	2.80928	0.653156	0.497006	0.254539
S02	4.00188	0.438721	0.782851	0.538045	0.165124
S02	1.20123	0.280363	0.803008	0.674677	0.209806
S02	3.39673	1.50563	0.646969	0.551345	0.519641
S02	4.21605	0.598757	0.718851	0.53051	0.391837
S02	6.57172	1.02888	0.739703	0.507799	-0.0229843
S02	13.3639	2.6786	0.595976	0.466504	0.296264
S02	5.07331	0.702135	0.772657	0.539842	0.333019
S02	1.90156	0.414813	0.753927	0.538357	0.353715
S02	2.28052	0.29672	0.792173	0.542324	-0.0127696
S02	1.04826	0.207094	0.789098	0.584229	0.750755
S02	5.04132	0.69693	0.670308	0.503415	0.203394
S02	19.026	2.09203	0.461373	0.339088	0.545638
S02	10.156	1.23053	0.596547	0.426186	0.318883
S02	49.4164	4.47038	0.0527674	0.0428909	-0.766963
S02	3.044	0.397122	0.671468	0.477862	0.185054
S02	5.87312	0.946078	0.621327	0.424779	-0.300799
S02	18.7252	2.33301	0.43611	0.304517	-0.189905
S02	3.37712	0.674466	0.634692	0.464807	0.885126
S02	9.57805	1.45477	0.551649	0.378726	0.271454
S02	8.67735	1.45983	0.564275	0.406063	0.265877
S02	2.44003	0.690695	0.588541	0.427517	0.781859
S02	4.16525	0.605869	0.573722	0.425154	0.574509
S02	7.66715	1.37789	0.532283	0.376933	0.911669
S02	5.47644	1.30768	0.499153	0.40101	0.784149
S02	7.51071	1.47437	0.500617	0.359503	0.802872
S02	1.4122	0.238582	0.588753	0.430044	0.615974
S02	6.12635	1.56988	0.502085	0.343204	0.197036
S02	25.7167	2.8421	0.285163	0.218408	-0.11055
S02	1.08305	1.04856	0.565065	0.429428	0.277285
S02	1.4186	0.355242	0.516238	0.382874	0.46255
S02	4.44106	1.39363	0.460946	0.402436	0.559032
S02	45.2058	4.61056	0.0522586	0.0473612	-0.560598
S02	20.8257	2.64334	0.342222	0.247949	0.112626
S02	5.70949	0.896586	0.471022	0.354314	0.148718
S02	25.0487	3.10347	0.317732	0.238379	0.733755
S02	1.43824	0.522067	0.519304	0.382653	0.455057
S02	1.47327	0.29593	0.536893	0.402847	0.537003
S02	1.53715	0.268598	0.573244	0.401229	0.488217
S02	5.70394	1.09254	0.491307	0.402394	0.830724
S02	5.28577	2.62738	0.508412	0.339647	0.0640193
S02	2.45673	0.334831	0.587338	0.401874	0.0118005
S02	1.74652	1.74265	0.526933	0.37	0.0641616
S02	11.3208	1.37174	0.522431	0.358449	0.0919899
S02	1.85775	0.194388	0.62189	0.428909	0.0562497
S02	1.8229	0.20979	0.619096	0.425984	0.0593039
S02	1.28795	0.150891	0.634493	0.437382	0.0965773
S02	4.68917	1.38804	0.488716	0.444094	0.57224
S02	3.17532	0.347099	0.655481	0.454259	0.157577
S02	3.50133	1.48478	0.559097	0.504323	0.403988
S02	7.88878	1.44224	0.560157	0.42946	0.749189
S02	27.9472	3.57077	0.280856	0.218163	-0.0428977
S02	4.98678	0.810183	0.613499	0.454372	0.536293
S02	1.27753	0.226167	0.712436	0.487832	0.174251
S02	15.481	2.77366	0.526829	0.383503	0.484508
S02	5.25253	0.525809	0.698416	0.474654	0.0673045
S02	1.89694	0.781468	0.676675	0.526705	0.565598
S02	2.85006	1.96378	0.636467	0.534326	0.547635
S02	2.07253	0.254233	0.763626	0.522462	0.130135
S02	5.42157	0.545327	0.711308	0.489492	0.187034
S02	14.5498	1.78795	0.629269	0.424694	-0.379701
S02	20.8287	2.26671	0.506834	0.347114	-0.0892999
S02	3.5517	0.666651	0.762772	0.513492	-0.319502
S02	1.40654	0.393354	0.746041	0.560846	0.253846
S02	1.34999	0.162245	0.799157	0.543407	0.0589224
S02	15.1867	2.06177	0.602855	0.404028	-0.285427
S02	1.87645	0.560725	0.782951	0.530717	0.420027
S02	3.14697	0.518135	0.775537	0.528331	-0.0496734
S02	2.72694	0.295205	0.781212	0.530176	0.120676
S02	6.13627	0.830129	0.749672	0.505096	0.0371731
S02	18.5549	2.24429	0.460078	0.321156	-0.47959
S02	1.00972	0.162687	0.758863	0.530353	0.209105
S02	1.67235	0.42483	0.711569	0.551784	0.521674
S02	1.37839	0.31634	0.732409	0.521166	0.181188
S02	16.1986	2.23245	0.39689	0.342906	0.561768
S02	36.648	3.86881	0.214747	0.160029	-0.328038
S02	2.6624	0.98818	0.65356	0.558155	0.76633
S02	13.829	1.95637	0.475187	0.331503	-0.521688
S02	26.9188	2.8855	0.35162	0.253475	-0.0955442
S02	11.9967	1.77953	0.508392	0.401867	0.152511
S02	1.88708	0.905355	0.683919	0.507256	0.268031

## Sheet: S02 fully propogated all data
Primary reference material	Iolite DRS	LA Settings
WC1	X_U_Pb_Geochron4 with total beam as index channel with a 20000 threshold cutoff and ignoring 235	100um, 10Hz, 30sec, fluence 5 J/cm2
	Tera-Wasserberg plot
Sample	238U/206Pb	2SE Propogated with Ref material uncertenties added in quadrature	207Pb/206Pb	2SE Propogated with Ref material uncertenties added in quadrature	Rho
S02	3.67206	1.28139	0.559295	0.454592	0.217865
S02	0.168331	0.561664	0.591288	0.436306	0.789531
S02	0.761505	0.798166	0.613318	0.496065	0.0400928
S02	0.637337	0.130184	0.615086	0.448419	0.737368
S02	0.302704	0.0964615	0.670293	0.485348	0.475769
S02	18.6527	2.33205	0.362441	0.261415	-0.0004156
S02	0.969802	0.293082	0.594229	0.439242	0.564221
S02	3.6539	1.45311	0.430254	0.362591	0.250987
S02	2.84964	0.763784	0.550233	0.440294	0.546368
S02	0.553374	0.165756	0.627003	0.4441	0.56567
S02	2.50342	0.850747	0.560607	0.4845	0.706066
S02	28.2701	4.23344	0.272047	0.22828	0.168673
S02	1.09646	0.364906	0.625078	0.504071	0.616784
S02	11.4667	1.40544	0.548221	0.37253	-0.0061997
S02	1.57472	0.334743	0.626123	0.447856	0.779075
S02	12.8417	1.74646	0.499504	0.342224	-0.288714
S02	4.13225	0.478251	0.64033	0.435605	-0.0972257
S02	0.542342	0.103541	0.670835	0.462723	0.0942012
S02	6.42383	1.44305	0.490448	0.462714	0.685508
S02	2.90714	0.406627	0.651621	0.443186	-0.155615
S02	4.6268	2.17393	0.500683	0.390499	0.133984
S02	19.8287	2.21148	0.434916	0.301337	-0.025028
S02	14.2635	1.55459	0.537253	0.363941	-0.421698
S02	0.893314	0.126535	0.729883	0.49406	0.269375
S02	4.09423	0.484513	0.663627	0.461168	-0.0097598
S02	5.17455	0.724643	0.66843	0.46069	-0.109168
S02	19.5619	2.28133	0.378076	0.281086	-0.162503
S02	1.44088	0.533464	0.659512	0.548604	0.417816
S02	6.5307	1.59503	0.568317	0.398455	-0.129001
S02	2.24618	0.250538	0.716946	0.486674	0.0324978
S02	29.515	2.94292	0.311868	0.22949	-0.059036
S02	21.8612	2.52455	0.418741	0.286519	-0.568119
S02	20.6318	2.17142	0.47024	0.326326	-0.466467
S02	5.06434	0.732793	0.702439	0.474242	-0.526995
S02	12.604	2.16561	0.517351	0.358126	-0.275029
S02	22.2667	2.54149	0.386834	0.280676	0.171981
S02	1.71796	0.2208	0.757944	0.515266	-0.0470275
S02	16.5964	2.18901	0.504517	0.355396	-0.127199
S02	3.57841	0.41319	0.731374	0.499448	-0.007945
S02	2.94418	2.54	0.569614	0.405158	-0.264299
S02	6.03989	0.740831	0.707997	0.48144	-0.241896
S02	8.01065	1.36129	0.660433	0.452549	0.130263
S02	1.28021	0.257099	0.779423	0.529241	-0.288478
S02	23.5973	3.26376	0.412098	0.336242	0.194179
S02	14.6025	1.65284	0.585225	0.403336	-0.0486001
S02	0.194418	0.0222248	0.824432	0.561237	0.121003
S02	0.345537	0.0577616	0.788154	0.60322	0.208666
S02	5.22254	0.628884	0.737534	0.505384	0.180213
S02	2.52377	0.867056	0.663067	0.532358	0.82052
S02	5.44056	0.618448	0.739509	0.507584	0.0187044
S02	8.01194	0.880266	0.725729	0.494308	0.102024
S02	12.0001	1.39032	0.641052	0.436169	-0.152672
S02	1.59788	0.172556	0.801687	0.547454	0.0530088
S02	0.685104	0.152107	0.82365	0.559876	0.222107
S02	13.1988	1.63181	0.572231	0.40096	-0.0028492
S02	2.26969	0.415499	0.794849	0.563063	0.402396
S02	4.63716	0.635982	0.746914	0.508778	0.180215
S02	0.0485871	0.0202007	0.965082	0.661191	0.970698
S02	0.805155	0.109915	0.821342	0.559166	-0.212948
S02	2.69265	0.345735	0.804609	0.544513	-0.197243
S02	8.5938	1.30584	0.713755	0.501608	0.359404
S02	1.57203	0.43374	0.742802	0.640496	0.568845
S02	0.288402	0.0840137	0.779339	0.56374	0.571803
S02	3.53163	2.80928	0.653156	0.497006	0.254539
S02	4.00188	0.438721	0.782851	0.538045	0.165124
S02	1.20123	0.280363	0.803008	0.674677	0.209806
S02	0.456444	0.113691	0.826116	0.61091	0.348289
S02	3.39673	1.50563	0.646969	0.551345	0.519641
S02	0.284401	0.923836	0.803096	0.656989	0.53906
S02	4.21605	0.598757	0.718851	0.53051	0.391837
S02	6.57172	1.02888	0.739703	0.507799	-0.0229843
S02	13.3639	2.6786	0.595976	0.466504	0.296264
S02	5.07331	0.702135	0.772657	0.539842	0.333019
S02	0.651243	0.210718	0.799186	0.666846	0.584354
S02	0.160813	0.116603	0.8458	0.600841	0.945085
S02	0.0894319	0.0264242	0.843761	0.576247	0.0493524
S02	1.90156	0.414813	0.753927	0.538357	0.353715
S02	2.28052	0.29672	0.792173	0.542324	-0.0127696
S02	0.622502	0.139617	0.775423	0.547716	0.192634
S02	0.17617	0.0365014	0.869714	0.593476	0.177458
S02	0.0701039	0.160237	0.794912	0.651865	0.428264
S02	0.460602	0.426015	0.711799	0.628472	0.796937
S02	0.143775	0.156224	0.820094	0.621547	0.851962
S02	0.484972	0.136364	0.805539	0.553181	0.0776135
S02	1.04826	0.207094	0.789098	0.584229	0.750755
S02	0.699693	0.817955	0.710257	0.573977	0.390962
S02	0.696278	0.275007	0.766459	0.544516	0.351208
S02	0.0833372	0.0607923	0.817894	0.56131	0.8068
S02	5.04132	0.69693	0.670308	0.503415	0.203394
S02	19.026	2.09203	0.461373	0.339088	0.545638
S02	10.156	1.23053	0.596547	0.426186	0.318883
S02	49.4164	4.47038	0.0527674	0.0428909	-0.766963
S02	0.350732	0.154901	0.687848	0.523647	0.54485
S02	0.06056	0.0149473	0.70677	0.481978	0.547816
S02	0.0308384	0.0703299	0.710346	0.485835	0.557576
S02	3.044	0.397122	0.671468	0.477862	0.185054
S02	5.87312	0.946078	0.621327	0.424779	-0.300799
S02	18.7252	2.33301	0.43611	0.304517	-0.189905
S02	3.37712	0.674466	0.634692	0.464807	0.885126
S02	9.57805	1.45477	0.551649	0.378726	0.271454
S02	8.67735	1.45983	0.564275	0.406063	0.265877
S02	2.44003	0.690695	0.588541	0.427517	0.781859
S02	4.16525	0.605869	0.573722	0.425154	0.574509
S02	7.66715	1.37789	0.532283	0.376933	0.911669
S02	0.119225	0.0233681	0.654465	0.445726	0.0520436
S02	0.216782	0.0519021	0.618459	0.445314	0.627046
S02	0.0266044	0.428612	0.656736	0.522526	0.77617
S02	0.366204	0.0759064	0.615478	0.449897	0.461661
S02	5.47644	1.30768	0.499153	0.40101	0.784149
S02	0.30372	0.0741801	0.64689	0.465413	0.393325
S02	0.438989	0.213516	0.626948	0.436816	0.164143
S02	7.51071	1.47437	0.500617	0.359503	0.802872
S02	1.4122	0.238582	0.588753	0.430044	0.615974
S02	0.0727455	0.0267162	0.642361	0.446468	0.347846
S02	6.12635	1.56988	0.502085	0.343204	0.197036
S02	25.7167	2.8421	0.285163	0.218408	-0.11055
S02	0.84279	0.207119	0.575773	0.462427	0.749605
S02	0.0558082	0.0567017	0.601451	0.409078	-0.0309372
S02	1.08305	1.04856	0.565065	0.429428	0.277285
S02	0.445107	0.0937972	0.59485	0.41299	0.634081
S02	1.4186	0.355242	0.516238	0.382874	0.46255
S02	0.171451	0.0475276	0.600275	0.41276	0.260741
S02	4.44106	1.39363	0.460946	0.402436	0.559032
S02	0.318006	0.548595	0.581569	0.433915	0.457755
S02	45.2058	4.61056	0.0522586	0.0473612	-0.560598
S02	20.8257	2.64334	0.342222	0.247949	0.112626
S02	0.446693	0.157286	0.573091	0.382982	0.43549
S02	5.70949	0.896586	0.471022	0.354314	0.148718
S02	25.0487	3.10347	0.317732	0.238379	0.733755
S02	0.697496	0.120663	0.570973	0.396766	0.0124313
S02	0.490214	0.179362	0.581008	0.45699	0.336115
S02	0.839891	0.247175	0.576928	0.393695	0.0342406
S02	0.151944	0.466449	0.586448	0.518434	0.349738
S02	1.43824	0.522067	0.519304	0.382653	0.455057
S02	1.47327	0.29593	0.536893	0.402847	0.537003
S02	0.0587516	0.00875616	0.602786	0.413946	0.0734408
S02	1.53715	0.268598	0.573244	0.401229	0.488217
S02	1.23076	0.258388	0.561057	0.457923	0.61893
S02	5.70394	1.09254	0.491307	0.402394	0.830724
S02	0.86723	0.124085	0.616757	0.42245	0.301942
S02	5.28577	2.62738	0.508412	0.339647	0.0640193
S02	2.45673	0.334831	0.587338	0.401874	0.0118005
S02	1.74652	1.74265	0.526933	0.37	0.0641616
S02	0.247828	0.0417959	0.634596	0.430777	0.0775797
S02	0.281873	0.0383598	0.641529	0.449913	0.287974
S02	11.3208	1.37174	0.522431	0.358449	0.0919899
S02	1.85775	0.194388	0.62189	0.428909	0.0562497
S02	1.8229	0.20979	0.619096	0.425984	0.0593039
S02	1.28795	0.150891	0.634493	0.437382	0.0965773
S02	4.68917	1.38804	0.488716	0.444094	0.57224
S02	0.63858	0.0953941	0.672602	0.457408	0.0181557
S02	3.17532	0.347099	0.655481	0.454259	0.157577
S02	3.50133	1.48478	0.559097	0.504323	0.403988
S02	0.281843	0.0925628	0.653031	0.497673	0.0929817
S02	7.88878	1.44224	0.560157	0.42946	0.749189
S02	27.9472	3.57077	0.280856	0.218163	-0.0428977
S02	4.98678	0.810183	0.613499	0.454372	0.536293
S02	1.27753	0.226167	0.712436	0.487832	0.174251
S02	2.19712	0.906537	0.559409	1.10788	0.0683437
S02	0.163174	0.0297736	0.714195	0.491119	0.0563966
S02	15.481	2.77366	0.526829	0.383503	0.484508
S02	5.25253	0.525809	0.698416	0.474654	0.0673045
S02	0.16306	0.0434313	0.759556	0.523038	0.0823217
S02	0.343657	0.102087	0.759615	0.517578	0.11407
S02	1.89694	0.781468	0.676675	0.526705	0.565598
S02	0.265102	0.249546	0.722796	0.535243	0.578114
S02	2.85006	1.96378	0.636467	0.534326	0.547635
S02	0.845137	0.143495	0.794045	0.588157	0.016791
S02	2.07253	0.254233	0.763626	0.522462	0.130135
S02	5.42157	0.545327	0.711308	0.489492	0.187034
S02	14.5498	1.78795	0.629269	0.424694	-0.379701
S02	20.8287	2.26671	0.506834	0.347114	-0.0892999
S02	3.5517	0.666651	0.762772	0.513492	-0.319502
S02	0.286318	0.0503877	0.794689	0.55384	0.310654
S02	1.40654	0.393354	0.746041	0.560846	0.253846
S02	0.130446	0.0188494	0.821311	0.567987	0.126484
S02	0.10483	0.0176416	0.841119	0.575258	0.309995
S02	1.34999	0.162245	0.799157	0.543407	0.0589224
S02	15.1867	2.06177	0.602855	0.404028	-0.285427
S02	1.87645	0.560725	0.782951	0.530717	0.420027
S02	3.14697	0.518135	0.775537	0.528331	-0.0496734
S02	2.72694	0.295205	0.781212	0.530176	0.120676
S02	6.13627	0.830129	0.749672	0.505096	0.0371731
S02	18.5549	2.24429	0.460078	0.321156	-0.47959
S02	1.06534	0.121696	0.792201	0.544803	0.182027
S02	1.00972	0.162687	0.758863	0.530353	0.209105
S02	1.67235	0.42483	0.711569	0.551784	0.521674
S02	1.37839	0.31634	0.732409	0.521166	0.181188
S02	16.1986	2.23245	0.39689	0.342906	0.561768
S02	0.461614	0.055503	0.803154	0.547314	0.285099
S02	0.960827	3.20379	0.495769	0.375351	0.280912
S02	36.648	3.86881	0.214747	0.160029	-0.328038
S02	2.6624	0.98818	0.65356	0.558155	0.76633
S02	13.829	1.95637	0.475187	0.331503	-0.521688
S02	26.9188	2.8855	0.35162	0.253475	-0.0955442
S02	11.9967	1.77953	0.508392	0.401867	0.152511
S02	1.88708	0.905355	0.683919	0.507256	0.268031

## Sheet: reference materials
Primary reference material	Secondary reference material	Iolite DRS	LA Settings
WC1	NIST612	X_U_Pb_Geochron4 with total beam as index channel with a 20000 threshold cutoff and ignoring 235	100um, 10Hz, 30sec, fluence 5 J/cm2
	Tera-Wasserberg plot							WC1 Fully propogated uncertenties (Pb anchored at 0.85)							WC1 (Pb anchored at 0.85) NOT PROPOGATED
Sample	238U/206Pb	2SE propogated	207Pb/206Pb	2SE propogated	Rho
WC1	23.6407	1.48451	0.0660347	0.0456712	-0.652114
WC1	24.3517	1.80295	0.0776358	0.040781	-0.196002
WC1	24.1627	1.67196	0.0746528	0.0489087	-0.0435391
WC1	23.9627	1.97295	0.0770664	0.0398676	-0.136183
WC1	23.2926	1.64209	0.0946478	0.0512281	-0.568612
WC1	23.5371	1.89459	0.086393	0.0388443	-0.11946
WC1	23.7149	1.9057	0.0835131	0.044892	0.0744253
WC1	23.6324	1.85958	0.0863	0.0426414	0.333939
WC1	23.2568	1.97925	0.0792121	0.0396725	-0.377529
WC1	23.346	1.67655	0.0999507	0.0467709	-0.232147
WC1	24.7724	1.88233	0.0589554	0.0344854	-0.437476
WC1	22.879	1.52229	0.0967446	0.0538116	-0.459823
WC1	23.753	1.88682	0.0778221	0.037469	0.0814761
WC1	23.4207	1.95998	0.087512	0.0442302	0.0775047
WC1	23.0667	2.03692	0.0886625	0.0435512	0.378075
NIST612	3.98406	0.0349201	0.8468	0.0034	0.42823
NIST612	3.89712	0.0288563	0.8466	0.0027	0.055424
NIST612	3.83289	0.0279129	0.8394	0.0029	0.21038
NIST612	3.80807	0.0246524	0.8354	0.003	0.13191
NIST612	3.81971	0.0248033	0.8334	0.0026	0.15626
NIST612	3.84172	0.02509	0.8297	0.003	0.19121
NIST612	3.85803	0.023815	0.8272	0.0033	0.22024
NIST612	3.88954	0.0242056	0.8239	0.0027	-0.009341
NIST612	3.92465	0.0261848	0.8219	0.0031	0.24339
NIST612	3.89105	0.0257385	0.8201	0.0031	0.018279
NIST612	3.87147	0.0239812	0.8185	0.0029	0.23526
NIST612	3.81971	0.0204263	0.8105	0.003	0.079939
NIST612	3.82995	0.0234696	0.81	0.0027	0.18902
NIST612	3.83583	0.0220703	0.8047	0.0031	0.18495
NIST612	3.84763	0.0251673	0.8061	0.0029	0.1572
SECONADARY REFERENCE MATERIAL U and Pb conc in this run	Pb204_ppm_mean	2SE	Pb206_ppm_mean	2SE	Pb207_ppm_mean	2SE	Pb208_ppm_mean	2SE	Th232_ppm_mean	2SE	U235_ppm_mean	2SE	U238_ppm_mean	2SE			CERTIFIED NIST VALUES
																		Parameter	Value (PPM)
NIST612	35.2797	7.1466	36.6776	0.438572	36.851	1.26272	36.6464	2.65208	36.5505	0.358448	35.9038	1.79816	37.2729	0.733583				Antimony	34.9
NIST612	38.6519	0.4527	38.3332	0.1391	38.4648	0.146307	38.4354	0.139369	37.8367	0.134949	35.5037	1.29011	37.1107	0.448305				Arsenic	37.4
NIST612	38.8367	0.420996	38.5649	0.15212	38.5592	0.146465	38.6477	0.153673	37.9061	0.1139	37.5995	1.3409	36.7454	0.409731				Barium	38.6
NIST612	38.8015	0.458923	39.0232	0.113379	38.9284	0.130852	39.0025	0.148141	38.1536	0.114691	38.1272	1.22965	37.1084	0.44711				Boron	32
NIST612	38.7588	0.498254	38.7956	0.123025	38.8048	0.131492	38.8515	0.144076	37.8694	0.130025	38.5847	1.24417	37.1907	0.47853				Cadmium	29.9
NIST612	38.6634	0.465664	38.6312	0.126563	38.5295	0.116347	38.4868	0.140195	37.8264	0.115643	38.0945	1.27443	37.6766	0.454551				Cerium	39
NIST612	38.6133	0.519915	38.6801	0.129985	38.6423	0.142285	38.6659	0.139868	37.5518	0.127722	38.1006	1.26205	37.0755	0.497888				Chromium	35
NIST612	38.7013	0.520479	38.8431	0.126123	38.7861	0.12668	38.8098	0.145418	37.8291	0.115812	37.1394	1.17276	37.0982	0.514691				Cobalt	35.5
NIST612	38.537	0.459216	38.4449	0.147746	38.4912	0.141971	38.2942	0.138413	37.7278	0.107956	38.3	1.21808	37.0007	0.436604				Copper	37.7
NIST612	38.1386	0.47127	38.373	0.154795	38.3951	0.156968	38.3219	0.151347	37.6485	0.122644	37.4228	1.19218	37.1501	0.456688				Dysprosium	35
NIST612	38.4629	0.478707	38.4649	0.127469	38.5597	0.131225	38.4845	0.134797	37.6028	0.11883	36.9429	1.30157	37.2074	0.476098				Erbium	39
NIST612	39.4018	0.444344	39.282	0.130451	39.1821	0.13268	39.2325	0.144993	38.099	0.114152	36.6695	1.20957	37.151	0.422879				Europium	36
NIST612	38.9524	0.448585	38.9736	0.133454	39.0434	0.128137	39.023	0.148253	38.1843	0.119109	38.5968	1.26472	37.1087	0.445955				Gadolinium	39
NIST612	38.1915	0.486596	38.3606	0.129276	38.3306	0.127821	38.4054	0.135975	37.8228	0.117393	36.4193	1.27479	37.4641	0.477975				Gold	5
NIST612	38.0096	0.488887	37.8136	0.140363	37.8035	0.144242	37.999	0.136817	37.3556	0.122772	36.7087	1.34566	37.0518	0.477064				Iron	51
average	38.4	0.917409	38.4841	0.154161	38.4914	0.211079	38.4871	0.310228	37.731	0.135603	37.3409	1.29459	37.1608	0.47851				Lanthanum	36
																		Lead	38.57
																		Lithium	40
																		Manganese	37.7
																		Neodymium	36
																		Nickel	38.8
																		Potassium	64
																		Rubidium	31.4
																		Samarium	39
																		Selenium	16.1
																		Silver	22
																		Strontium	78.4
																		Thallium	15.7
																		Thorium	37.79
																		Titanium	50.1
																		Uranium	37.38
																		Ytterbium	42

## Sheet: Method Summary
Laboratory and Sample Preparation
Laboratory name	Geography, Geology and Environment, University of Hull
Sample type/mineral	Insitucalcite
Sample preparation	Polished sections
Imaging	No images provided. Images for maps constructed using laser camera
Laser ablation system
Make, Model and type	Applied Spectra, RESOlution-SE 193nm
Ablation cell and volume	Laurin Technic S155 two volumn cell
Laser wavelength	193 nm
Pulse width (ns)	5 ns
Fluence (J cm-2)	5 J sm-2
Repition rate (Hz)	10 Hz
Ablation duration (s)	30s
Spot diameter	100 microns
Sample mode/pattern	Static spot ablation
Carrier gas	He + N2 in the cell, Ar carrier gas to torch
ICP-MS Instrument
Make, Model and type	Agilent 8800
Sample introdution	Ablation aerosol mixed with Ar and sent to ICP-Ms
RF power (w)	1170 W
Nebuliser gas flow	Ar 0.86 l min-1
Detection system	Electron multiplier in counts per second mode
Masses measured	204, 206, 207, 208, 232, 235, 238
Integration time	208, 235, 232 = 0.01; 204, 238 = 0.015; 206, 207 = 0.025
Data Processing
Calibration strategy	WC1 used as primary reference material, NIST612 used as secondaries/validation
Reference Material Information	WC1 (Roberts et al 2017)
Data processing package	Iolite v4, Data Reduction Scheme - X_U_Pb_Geochron4 (Paton et al., 2011)
Common Pb correction	No common Pb coreection applied to this data
Uncertentie calculations	All uncertenties were fully propogate within iolite v4 with standard refernce material uncertenties added in quadrature

## Sheet: linescans of undateable samples
	Ca43_CPS	Ca43_CPS_Int2SE	Mg_ppm_m25	Mg_ppm_m25_Int2SE	Si_ppm_m28	Si_ppm_m28_Int2SE	Pb_ppm_m204	Pb_ppm_m204_Int2SE	Pb_ppm_m206	Pb_ppm_m206_Int2SE	Pb_ppm_m207	Pb_ppm_m207_Int2SE	Pb_ppm_m208	Pb_ppm_m208_Int2SE	Th_ppm_m232	Th_ppm_m232_Int2SE	U_ppm_m235	U_ppm_m235_Int2SE	U_ppm_m238	U_ppm_m238_Int2SE
NA02	4550000	22000	633	15	810	270	3.74	0.16	2.019	0.064	1.94	0.061	1.985	0.064	0.15	0.012	0.123	0.059	0.0396	0.0038
NA02_1	4680000	25000	666.3	8	1172	79	2.71	0.11	1.238	0.027	1.191	0.024	1.218	0.024	0.0667	0.0041	0.072	0.038	0.0209	0.004
NA02_2	4600000	38000	704	17	-2200	150	4.36	0.25	2.72	0.11	2.72	0.18	2.71	0.12	0.0671	0.0094	0.023	0.031	0.0119	0.0024
NA02_3	4700000	47000	573	11	3458	69	3.35	0.16	2.122	0.069	2.039	0.067	2.088	0.068	0.0458	0.0044	0.224	0.088	0.043	0.011
NA02_4	4500000	34000	526.6	7	-2923	68	3.16	0.14	1.664	0.039	1.597	0.039	1.65	0.039	0.171	0.021	0.092	0.054	0.0202	0.0018
NA02_5	4400000	33000	783	46	3730	390	2.85	0.18	1.53	0.061	1.459	0.06	1.521	0.062	0.236	0.032	0.149	0.088	0.0479	0.0073
BI01	4450000	46000	2029	60	930	300	3.44	0.42	1.78	0.22	1.68	0.2	1.73	0.22	0.044	0.011	0.8	0.29	0.222	0.013
BI01_1	4310000	31000	1925	46	3370	380	2.82	0.19	1.429	0.076	1.341	0.072	1.379	0.072	0.084	0.011	0.63	0.21	0.234	0.013
BI01muddy	3720000	87000	2386	78	410000	180000	88	45	90	46	86	43	85	43	0.227	0.055	1.05	0.93	0.427	0.078
BI01cata	1660000	68000	8510	930	37100000	7800000	103	44	29.7	7.8	29	11	71	96	4.33	0.87	27	27	6.6	3.6
BI01dark	4080000	28000	2006	25	2190	190	2.77	0.21	1.462	0.065	1.365	0.062	1.397	0.066	0.0685	0.0073	0.46	0.18	0.1312	0.0056
H02	4210000	25000	1314	18	68000	26000	3.09	0.36	0.844	0.082	0.81	0.1	0.806	0.081	0.038	0.013	0.323	0.087	0.078	0.011
H02_1	4200000	18000	1432	18	-4178	75	2.63	0.14	1.34	0.1	1.223	0.066	1.234	0.069	0.0199	0.0022	0.111	0.052	0.029	0.022
H02_2	4330000	14000	1389	18	2875	68	1.255	0.085	0.371	0.015	0.358	0.015	0.357	0.015	0.0033	0.00061	0.054	0.039	0.0183	0.0015
H02_3	4900000	26000	2576	17	2320	220	2.19	0.14	1.197	0.035	1.146	0.03	1.152	0.031	0.0691	0.0084	0.142	0.073	0.0384	0.0049

## Sheet: Unsuccessful dating of NA02
	Source file	DateTime	Date	Time	Duration(s)	Total points	Selection type	Components	Final207_235	Final207_235_Int2SE	Final206_238	Final206_238_Int2SE	ErrorCorrelation_6_38vs7_35	Final238_206	Final238_206_Int2SE	Final207_206	Final207_206_Int2SE	ErrorCorrelation_38_6vs7_6	Final208_232	Final208_232_Int2SE	Final206_208	Final206_208_Int2SE	FinalAge207_235	FinalAge207_235_Int2SE	FinalAge206_238	FinalAge206_238_Int2SE	FinalAge208_232	FinalAge208_232_Int2SE	FinalAge207_206	FinalAge207_206_Int2SE	Final206_204	Final206_204_Int2SE	Final207_204	Final207_204_Int2SE	Final208_204	Final208_204_Int2SE	Approx_U_PPM	Approx_U_PPM_Int2SE	Approx_Th_PPM	Approx_Th_PPM_Int2SE	Approx_Pb_PPM	Approx_Pb_PPM_Int2SE	Final_U_Th_Ratio	Final_U_Th_Ratio_Int2SE
C_WC1v2_1	002SMPL	23/10/2019 (4) 12:06:32.24	23/10/2019 (4)	00:06:32.200000	29.966	224	Normal	1	0.845	0.053	0.04341	0.00093	0.24649	23.0362	0.493518	0.131	0.012	0.38328	no value	NAN	no value	NAN	601	27	273.8	5.7	no value	NAN	1830	160	193	38	23.4	7.1	no value	NAN	3.81	0.15	0.012	0.0036	0.187	0.037	275	23
C_WC1v2_2	002SMPL	23/10/2019 (4) 12:14:59.05	23/10/2019 (4)	00:14:59.100000	29.992	223	Normal	1	0.705	0.048	0.04236	0.00069	0.20666	23.6072	0.384536	0.113	0.01	0.18586	no value	NAN	no value	NAN	532	29	267.4	4.3	no value	NAN	1500	160	-320	350	-48	42	no value	NAN	3.642	0.06	0.0115	0.0033	0.191	0.044	262	20
C_WC1v2_3	002SMPL	23/10/2019 (4) 12:23:25.81	23/10/2019 (4)	00:23:25.800000	29.966	224	Normal	1	0.59	0.03	0.04254	0.00069	0.15835	23.5073	0.381289	0.087	0.0054	0.45656	no value	NAN	no value	NAN	463	19	268.5	4.3	no value	NAN	1220	130	680	350	64	29	no value	NAN	4.44	0.14	0.0137	0.0034	0.171	0.032	325	28
C_WC1v2_4	002SMPL	23/10/2019 (4) 12:31:52.64	23/10/2019 (4)	00:31:52.600000	29.982	225	Normal	1	0.617	0.034	0.04234	0.00082	-0.041802	23.6183	0.457417	0.0954	0.0077	0.37042	no value	NAN	no value	NAN	476	21	267.2	5.1	no value	NAN	1300	150	290	110	24.3	9	no value	NAN	3.403	0.071	0.0062	0.0025	0.177	0.033	293	15
C_WC1v2_5	002SMPL	23/10/2019 (4) 12:40:18.56	23/10/2019 (4)	00:40:18.600000	30.014	224	Normal	1	0.523	0.029	0.04093	0.00066	0.3038	24.432	0.393968	0.0833	0.0063	0.57818	no value	NAN	no value	NAN	418	19	258.5	4.1	no value	NAN	1050	140	610	300	41	19	no value	NAN	3.791	0.032	0.045	0.0072	0.169	0.029	226	33
C_WC1v2_6	002SMPL	23/10/2019 (4) 12:48:43.73	23/10/2019 (4)	00:48:43.700000	30.03	224	Normal	1	0.768	0.037	0.04279	0.00062	0.09549	23.3699	0.338616	0.1152	0.0089	0.034023	no value	NAN	no value	NAN	568	22	270.1	3.8	no value	NAN	1660	140	260	120	31	15	no value	NAN	3.526	0.064	0.055	0.0093	0.258	0.053	172	24
C_WC1v2_7	002SMPL	23/10/2019 (4) 12:57:10.00	23/10/2019 (4)	00:57:10	29.966	223	Normal	1	0.693	0.04	0.04258	0.0008	0.1534	23.4852	0.441244	0.0992	0.0063	0.41704	no value	NAN	no value	NAN	519	24	268.7	4.9	no value	NAN	1430	140	96	67	14.3	9.7	no value	NAN	3.722	0.075	0.0144	0.0051	0.179	0.026	283	18
C_WC1v2_8	002SMPL	23/10/2019 (4) 13:05:36.15	23/10/2019 (4)	00:05:36.100000	29.986	224	Normal	1	0.641	0.036	0.04177	0.00079	0.081578	23.9406	0.452791	0.0964	0.0077	0.19047	no value	NAN	no value	NAN	489	23	263.7	4.9	no value	NAN	1320	160	230	110	33	15	no value	NAN	3.76	0.14	0.0341	0.0077	0.199	0.044	227	22
C_WC1v2_9	002SMPL	23/10/2019 (4) 13:14:00.53	23/10/2019 (4)	00:14:00.500000	30	224	Normal	1	0.708	0.036	0.04313	0.00083	0.0015839	23.1857	0.446189	0.1021	0.0074	0.25536	no value	NAN	no value	NAN	531	22	272.1	5.1	no value	NAN	1460	140	630	500	93	67	no value	NAN	3.791	0.09	0.0069	0.0031	0.155	0.024	278	16
C_WC1v2_10	002SMPL	23/10/2019 (4) 13:22:25.12	23/10/2019 (4)	00:22:25.100000	29.99	224	Normal	1	0.881	0.048	0.04341	0.00092	0.291	23.0362	0.488212	0.13	0.011	-0.20368	no value	NAN	no value	NAN	625	26	273.8	5.7	no value	NAN	1790	150	263	98	36	13	no value	NAN	3.633	0.046	0.06	0.011	0.184	0.032	181	20
C_WC1v2_11	002SMPL	23/10/2019 (4) 13:30:49.92	23/10/2019 (4)	00:30:49.900000	29.943	225	Normal	1	0.768	0.052	0.04304	0.00071	0.7036	23.2342	0.383278	0.1146	0.0091	-0.033144	no value	NAN	no value	NAN	562	27	272.1	4.5	no value	NAN	1570	130	200	3200	70	250	no value	NAN	4.143	0.09	0.306	0.036	0.25	0.039	125	30
C_WC1v2_12	002SMPL	23/10/2019 (4) 13:39:15.20	23/10/2019 (4)	00:39:15.200000	29.955	224	Normal	1	0.622	0.03	0.0415	0.00055	0.013236	24.0964	0.31935	0.0898	0.0063	0.05457	no value	NAN	no value	NAN	484	19	262.1	3.4	no value	NAN	1240	140	850	730	73	49	no value	NAN	3.618	0.053	0.062	0.016	0.136	0.023	355	28
C_WC1v2_13	002SMPL	23/10/2019 (4) 13:47:40.04	23/10/2019 (4)	00:47:40	29.984	225	Normal	1	0.97	0.054	0.04546	0.00088	0.28727	21.9974	0.425818	0.1247	0.0086	-0.37151	no value	NAN	no value	NAN	670	28	286.5	5.4	no value	NAN	1850	130	900	1200	140	130	no value	NAN	3.386	0.059	0.266	0.049	0.353	0.048	264	31
C_WC1v2_14	002SMPL	23/10/2019 (4) 13:53:16.48	23/10/2019 (4)	00:53:16.500000	29.934	224	Normal	1	0.477	0.026	0.03892	0.00068	0.12051	25.6937	0.448914	0.0743	0.0059	0.36141	no value	NAN	no value	NAN	390	18	246.1	4.2	no value	NAN	820	150	400	150	25	12	no value	NAN	4.178	0.056	0.197	0.061	0.19	0.032	385	26
C_WC1v2_15	002SMPL	23/10/2019 (4) 13:56:05.03	23/10/2019 (4)	00:56:05	29.972	225	Normal	1	0.899	0.05	0.04661	0.00094	0.13828	21.4546	0.432683	0.122	0.01	-0.065333	no value	NAN	no value	NAN	632	26	293.5	5.8	no value	NAN	1650	130	93	93	11	14	no value	NAN	6.79	0.14	0.48	0.17	1.17	0.18	264	16
C_WC1v2_16	002SMPL	23/10/2019 (4) 13:57:29.18	23/10/2019 (4)	00:57:29.200000	29.94	0	Normal	1	no value	NAN	no value	NAN	NaN			no value	NAN	NaN	no value	NAN	no value	NAN	no value	NAN	no value	NAN	no value	NAN	no value	NAN	no value	NAN	no value	NAN	no value	NAN	0	0.0001	0.0251	0.004	0.18	0.55	no value	NAN
G_NIST612_1	002SMPL	23/10/2019 (4) 12:05:07.72	23/10/2019 (4)	00:05:07.700000	29.966	223	Normal	1	43.6	1.3	0.2585	0.0019	0.85469	3.86847	0.0284336	1.0185	0.0041	0.30585	no value	NAN	no value	NAN	3836	39	1482	10	no value	NAN	5455.4	9.4	185.2	2.4	139.7	1.8	no value	NAN	22.95	0.39	284.6	4.8	63.6	1.1	-0.0003737	1.2e-06
G_NIST612_2	002SMPL	23/10/2019 (4) 12:13:34.61	23/10/2019 (4)	00:13:34.600000	29.95	224	Normal	1	43.6	1.2	0.2637	0.0019	0.83069	3.79219	0.0273233	0.9836	0.0035	0.32771	no value	NAN	no value	NAN	3834	39	1508	10	no value	NAN	5376.6	7.9	193.6	2.4	145.8	1.9	no value	NAN	25.33	0.47	316.7	5.8	87.7	1.6	-0.0003702	1.1e-06
G_NIST612_3	002SMPL	23/10/2019 (4) 12:22:01.26	23/10/2019 (4)	00:22:01.300000	30.04	224	Normal	1	42.6	1.2	0.2615	0.002	0.85681	3.82409	0.0292474	0.9597	0.0035	0.15622	no value	NAN	no value	NAN	3803	42	1497	10	no value	NAN	5322.6	7.9	193.8	2.5	146.9	1.9	no value	NAN	24.25	0.44	344.2	6.3	117.1	2.1	-0.0003689	1.1e-06
G_NIST612_4	002SMPL	23/10/2019 (4) 12:30:28.19	23/10/2019 (4)	00:30:28.200000	29.97	224	Normal	1	41	1.2	0.2588	0.0018	0.8316	3.86399	0.0268747	0.9261	0.0031	0.24909	no value	NAN	no value	NAN	3765	40	1483.3	9.1	no value	NAN	5246.8	6.9	198.1	2.5	149	1.9	no value	NAN	25.48	0.45	376.4	6.7	135.9	2.4	-0.0003664	1.1e-06
G_NIST612_5	002SMPL	23/10/2019 (4) 12:38:54.44	23/10/2019 (4)	00:38:54.400000	30.018	224	Normal	1	39.5	1.1	0.2548	0.0018	0.82797	3.92465	0.0277251	0.8976	0.0032	0.19863	no value	NAN	no value	NAN	3729	41	1462.8	9.3	no value	NAN	5182.4	7.3	202.3	2.7	151.2	2.1	no value	NAN	19.58	0.35	419.1	7.5	124.5	2.3	-0.000365	1e-06
G_NIST612_6	002SMPL	23/10/2019 (4) 12:47:19.15	23/10/2019 (4)	00:47:19.200000	29.99	224	Normal	1	39.5	1.1	0.2603	0.0017	0.83781	3.84172	0.02509	0.8724	0.0032	0.080895	no value	NAN	no value	NAN	3730	40	1491	8.7	no value	NAN	5125.4	7.2	204.6	2.6	152.6	1.9	no value	NAN	23.17	0.38	465.8	8	103	1.8	-0.0003635	1.1e-06
G_NIST612_7	002SMPL	23/10/2019 (4) 12:55:45.49	23/10/2019 (4)	00:55:45.500000	29.989	225	Normal	1	32.41	0.91	0.2183	0.0014	0.82225	4.58085	0.0293779	0.8478	0.003	0.35137	no value	NAN	no value	NAN	3541	37	1272.6	7.4	no value	NAN	5069.9	6.8	209.9	2.5	155.8	1.9	no value	NAN	34.25	0.55	533.9	8.9	94.2	1.7	-0.0004309	1.3e-06
G_NIST612_8	002SMPL	23/10/2019 (4) 13:04:12.09	23/10/2019 (4)	00:04:12.100000	29.972	224	Normal	1	37.2	1	0.2556	0.0017	0.84286	3.91236	0.0260212	0.8223	0.0029	0.13511	no value	NAN	no value	NAN	3669	41	1466.8	9	no value	NAN	5012.4	6.5	215.9	2.7	159.3	2	no value	NAN	29.55	0.48	617	10	91.5	1.5	-0.0003593	1.1e-06
G_NIST612_9	002SMPL	23/10/2019 (4) 13:12:36.47	23/10/2019 (4)	00:12:36.500000	29.968	224	Normal	1	36.7	1	0.2567	0.0019	0.84557	3.8956	0.0288338	0.8006	0.0033	0.30689	no value	NAN	no value	NAN	3656	41	1473	10	no value	NAN	4963.5	7.5	216.6	2.9	159.1	2.1	no value	NAN	32.33	0.54	730	12	89.1	1.5	-0.0003582	1e-06
G_NIST612_10	002SMPL	23/10/2019 (4) 13:21:01.04	23/10/2019 (4)	00:21:01	29.965	224	Normal	1	35.8	1	0.2562	0.0019	0.86151	3.9032	0.0289464	0.7776	0.0029	0.14788	no value	NAN	no value	NAN	3631	42	1469.8	9.8	no value	NAN	4911.6	6.6	223.2	2.9	162.7	2	no value	NAN	34.61	0.57	889	14	73.5	1.2	-0.0003572	1e-06
G_NIST612_11	002SMPL	23/10/2019 (4) 13:29:25.75	23/10/2019 (4)	00:29:25.700000	29.964	224	Normal	1	35.04	0.99	0.2562	0.0017	0.84767	3.9032	0.0258995	0.7562	0.0025	0.23235	no value	NAN	no value	NAN	3611	40	1470.1	8.8	no value	NAN	4863.3	5.7	226.3	2.6	163.9	1.9	no value	NAN	23.04	0.38	1160	19	63.6	1	-0.0003565	1e-06
G_NIST612_12	002SMPL	23/10/2019 (4) 13:37:50.92	23/10/2019 (4)	00:37:50.900000	29.99	225	Normal	1	34.62	0.98	0.257	0.0018	0.83952	3.89105	0.0272525	0.739	0.0027	0.42993	no value	NAN	no value	NAN	3606	38	1474.2	9.5	no value	NAN	4824.4	6.2	233.7	2.6	169.1	2	no value	NAN	22.53	0.34	1679	25	65.2	0.98	-0.0003554	1.1e-06
G_NIST612_13	002SMPL	23/10/2019 (4) 13:46:15.50	23/10/2019 (4)	00:46:15.500000	29.99	224	Normal	1	33.26	0.94	0.2508	0.0017	0.84838	3.98724	0.0270267	0.7225	0.0026	0.36775	no value	NAN	no value	NAN	3566	38	1442.3	9.1	no value	NAN	4787.1	5.9	242.1	3.3	174.4	2.4	no value	NAN	22.89	0.35	2970	42	77.5	1.1	-0.000355	1.1e-06
G_NIST612_14	002SMPL	23/10/2019 (4) 13:51:52.27	23/10/2019 (4)	00:51:52.300000	29.964	224	Normal	1	32.5	0.92	0.2487	0.0017	0.82662	4.02091	0.0274851	0.7083	0.0025	0.19936	no value	NAN	no value	NAN	3537	40	1431.3	8.7	no value	NAN	4755	5.7	241	3.1	172.2	2.2	no value	NAN	24.36	0.35	6125	78	128.2	1.7	-0.00035318	9.9e-07
G_NIST612_15	002SMPL	23/10/2019 (4) 13:54:40.48	23/10/2019 (4)	00:54:40.500000	29.992	224	Normal	1	32.6	0.93	0.2501	0.0018	0.8434	3.9984	0.028777	0.7038	0.0025	0.20768	no value	NAN	no value	NAN	3546	39	1438.9	9.2	no value	NAN	4744.8	5.6	243.8	3.2	174.5	2.3	no value	NAN	36.73	0.46	12540	150	240.4	3	-0.0003543	1e-06
Output_1_1	002SMPL	23/10/2019 (4) 12:07:56.75	23/10/2019 (4)	00:07:56.700000	29.95	122	Normal	1	264	37	2.38	0.34	0.31387	0.420168	0.060024	1.04	0.12	0.48725	no value	NAN	no value	NAN	5360	180	7080	550	no value	NAN	5410	290	63	17	35.8	7.3	no value	NAN	0.0369	0.0073	0.312	0.089	1.1	0.27	0.04	0.032
Output_1_2	002SMPL	23/10/2019 (4) 12:09:21.18	23/10/2019 (4)	00:09:21.200000	29.984	0	Normal	1	no value	NAN	no value	NAN	NaN			no value	NAN	NaN	no value	NAN	no value	NAN	no value	NAN	no value	NAN	no value	NAN	no value	NAN	no value	NAN	no value	NAN	no value	NAN	0.0029	0.00043	0.0042	0.0018	0.168	0.035	no value	NAN
Output_1_3	002SMPL	23/10/2019 (4) 12:10:45.64	23/10/2019 (4)	00:10:45.600000	29.974	47	Normal	1	790	250	9.5	3.8	0.35101	0.105263	0.0421053	1.02	0.17	0.2377	no value	NAN	no value	NAN	6440	270	13000	1400	no value	NAN	5380	410	60	16	45	14	no value	NAN	0.00531	0.0007	0.019	0.005	0.267	0.059	0.24	0.12
Output_1_4	002SMPL	23/10/2019 (4) 12:12:10.10	23/10/2019 (4)	00:12:10.100000	29.988	91	Normal	1	590	150	5.8	1.2	0.5742	0.172414	0.0356718	1.13	0.22	0.94423	no value	NAN	no value	NAN	5620	350	10400	1200	no value	NAN	5780	460	47	13	34.8	9.9	no value	NAN	0.0084	0.0011	0.0207	0.0061	0.391	0.087	0.36	0.1
Output_1_5	002SMPL	23/10/2019 (4) 12:16:23.53	23/10/2019 (4)	00:16:23.500000	29.958	26	Normal	1	240	110	5.3	2.4	0.9488	0.188679	0.0854397	0.99	0.3	0.54149	no value	NAN	no value	NAN	4530	710	8800	2600	no value	NAN	5800	1100	64	33	51	27	no value	NAN	0.00423	0.00054	0.0065	0.0024	0.233	0.061	0.38	0.16
Output_1_6	002SMPL	23/10/2019 (4) 12:17:47.99	23/10/2019 (4)	00:17:48	30.024	133	Normal	1	420	65	4.1	0.69	0.65001	0.243902	0.041047	1	0.1	0.67924	no value	NAN	no value	NAN	5780	220	8880	870	no value	NAN	5300	670	52	13	38.6	9.5	no value	NAN	0.0121	0.0013	0.042	0.011	0.7	0.17	0.6	0.13
Output_1_7	002SMPL	23/10/2019 (4) 12:19:12.41	23/10/2019 (4)	00:19:12.400000	29.966	19	Normal	1	930	180	19.6	3.6	0.93698	0.0510204	0.00937109	0.934	0.053	-0.11431	no value	NAN	no value	NAN	6910	290	19500	1500	no value	NAN	5260	120	177	46	125	30	no value	NAN	0.00427	0.00089	0.041	0.014	1.04	0.3	-0.0005	0.00016
Output_1_8	002SMPL	23/10/2019 (4) 12:20:36.87	23/10/2019 (4)	00:20:36.900000	29.974	67	Normal	1	307	83	5.2	1.5	0.95672	0.192308	0.0554734	0.88	0.11	0.37199	no value	NAN	no value	NAN	5350	310	9980	1300	no value	NAN	5070	280	53	18	36	12	no value	NAN	0.00662	0.0007	0.0147	0.0042	0.77	0.18	0.47	0.12
Output_1_9	002SMPL	23/10/2019 (4) 12:24:50.22	23/10/2019 (4)	00:24:50.200000	29.972	25	Normal	1	95	94	2.7	2.9	0.98241	0.37037	0.397805	0.02	0.95	0.62556	no value	NAN	no value	NAN	2820	930	4300	3000	no value	NAN	-21000	26000	70	77	46	49	no value	NAN	0.00318	0.00061	0.0206	0.0066	0.35	0.11	0.83	0.28
Output_1_10	002SMPL	23/10/2019 (4) 12:26:14.70	23/10/2019 (4)	00:26:14.700000	30.048	85	Normal	1	380	120	6.4	1.7	0.71553	0.15625	0.0415039	0.922	0.067	0.29935	no value	NAN	no value	NAN	5290	290	10000	1400	no value	NAN	5210	160	67	17	44	11	no value	NAN	0.0114	0.0014	0.038	0.014	1.03	0.19	0.99	0.28
Output_1_11	002SMPL	23/10/2019 (4) 12:27:39.18	23/10/2019 (4)	00:27:39.200000	30.006	28	Normal	1	590	190	9.8	2.9	0.66368	0.102041	0.0301958	0.97	0.18	-0.0012339	no value	NAN	no value	NAN	6290	300	14600	1700	no value	NAN	5350	410	122	60	106	53	no value	NAN	0.00487	0.00059	0.0043	0.0018	0.46	0.12	0.73	0.27
Output_1_12	002SMPL	23/10/2019 (4) 12:29:03.76	23/10/2019 (4)	00:29:03.800000	30.022	81	Normal	1	1040	200	11.8	1.7	0.77876	0.0847458	0.0122091	0.913	0.044	0.13536	no value	NAN	no value	NAN	6770	210	15460	820	no value	NAN	5215	99	102	31	71	22	no value	NAN	0.0084	0.0014	0.057	0.017	1.37	0.31	0.27	0.11
Output_1_13	002SMPL	23/10/2019 (4) 12:33:17.16	23/10/2019 (4)	00:33:17.200000	29.99	22	Normal	1	640	170	12.8	2.9	0.96603	0.078125	0.0177002	0.875	0.071	-0.35132	no value	NAN	no value	NAN	6460	320	16800	1500	no value	NAN	5130	160	132	93	103	74	no value	NAN	0.00386	0.00053	0.0146	0.0046	0.522	0.093	0.32	0.23
Output_1_14	002SMPL	23/10/2019 (4) 12:34:41.54	23/10/2019 (4)	00:34:41.500000	29.998	9	Normal	1	28	18	0.31	0.21	0.56005	3.22581	2.18522	2.4	3.5	0.89059	no value	NAN	no value	NAN	3030	630	1600	1000	no value	NAN	-23000	68000	2.4	1.5	4	2.2	no value	NAN	0.00283	0.00043	0.0037	0.0022	0.253	0.051	0.65	0.45
Output_1_15	002SMPL	23/10/2019 (4) 12:36:06.09	23/10/2019 (4)	00:36:06.100000	29.982	0	Normal	1	no value	NAN	no value	NAN	NaN			no value	NAN	NaN	no value	NAN	no value	NAN	no value	NAN	no value	NAN	no value	NAN	no value	NAN	no value	NAN	no value	NAN	no value	NAN	0.00118	0.00024	0.0055	0.0026	0.244	0.061	no value	NAN
Output_1_16	002SMPL	23/10/2019 (4) 12:37:30.30	23/10/2019 (4)	00:37:30.300000	30.04	3	Normal	1	250	130	6.8	2.5	0.97581	0.147059	0.0540657	0.9	0.2	-0.93153	no value	NAN	no value	NAN	5510	660	13100	2300	no value	NAN	5190	450	168	80	128	81	no value	NAN	0.00229	0.0004	0.0138	0.0056	0.418	0.088	-0.00055	0.00064
Output_1_17	002SMPL	23/10/2019 (4) 12:41:42.67	23/10/2019 (4)	00:41:42.700000	29.976	41	Normal	1	490	190	6.6	3.5	0.082831	0.151515	0.0803489	1.15	0.35	-0.029311	no value	NAN	no value	NAN	5590	480	10100	1800	no value	NAN	5440	940	200	130	62	50	no value	NAN	0.0084	0.0023	0.1	0.026	0.53	0.15	0.047	0.07
Output_1_18	002SMPL	23/10/2019 (4) 12:43:06.76	23/10/2019 (4)	00:43:06.800000	29.99	9	Normal	1	450	180	15.8	7.8	0.84823	0.0632911	0.031245	0.81	0.22	0.74852	no value	NAN	no value	NAN	6080	340	17000	2800	no value	NAN	4940	530	260	110	168	85	no value	NAN	0.0069	0.003	0.077	0.024	0.32	0.099	0.3	0.45
Output_1_19	002SMPL	23/10/2019 (4) 12:44:30.88	23/10/2019 (4)	00:44:30.900000	29.982	8	Normal	1	570	350	19	17	0.92517	0.0526316	0.0470914	0.87	0.15	0.46579	no value	NAN	no value	NAN	6150	550	16800	3900	no value	NAN	5110	350	185	46	134	37	no value	NAN	0.0057	0.0023	0.041	0.013	0.217	0.066	-0.0005	0.00035
Output_1_20	002SMPL	23/10/2019 (4) 12:45:55.02	23/10/2019 (4)	00:45:55	29.975	12	Normal	1	260	150	7.5	5.2	0.56631	0.133333	0.0924444	0.98	0.33	-0.24096	no value	NAN	no value	NAN	5110	730	11500	3100	no value	NAN	5290	800	97	48	101	62	no value	NAN	0.00373	0.00092	0.064	0.015	0.167	0.059	0.09	0.13
Output_1_21	002SMPL	23/10/2019 (4) 12:50:07.87	23/10/2019 (4)	00:50:07.900000	29.974	189	Normal	1	110	20	0.96	0.15	0.59739	1.04167	0.16276	1	0.23	0.36251	no value	NAN	no value	NAN	4260	190	3690	430	no value	NAN	6300	1500	39	16	23	10	no value	NAN	0.0267	0.0024	0.407	0.041	0.421	0.096	0.0023	0.0061
Output_1_22	002SMPL	23/10/2019 (4) 12:51:31.99	23/10/2019 (4)	00:51:32	29.982	97	Normal	1	160	36	2.04	0.51	0.3053	0.490196	0.122549	1.09	0.23	0.65154	no value	NAN	no value	NAN	4640	260	5700	830	no value	NAN	6400	1400	50	26	43	22	no value	NAN	0.0108	0.0014	0.152	0.025	0.264	0.067	0.056	0.04
Output_1_23	002SMPL	23/10/2019 (4) 12:52:56.49	23/10/2019 (4)	00:52:56.500000	29.998	0	Normal	1	no value	NAN	no value	NAN	NaN			no value	NAN	NaN	no value	NAN	no value	NAN	no value	NAN	no value	NAN	no value	NAN	no value	NAN	no value	NAN	no value	NAN	no value	NAN	0.00295	0.00049	0.038	0.014	0.36	0.077	no value	NAN
Output_1_24	002SMPL	23/10/2019 (4) 12:54:21.01	23/10/2019 (4)	00:54:21	29.998	23	Normal	1	260	82	6.1	1.6	0.94538	0.163934	0.0429992	0.924	0.099	0.6882	no value	NAN	no value	NAN	5370	430	11800	2100	no value	NAN	5240	220	85	77	58	54	no value	NAN	0.0048	0.00065	0.026	0.006	0.273	0.061	0.4	0.24
Output_1_25	002SMPL	23/10/2019 (4) 12:58:34.49	23/10/2019 (4)	00:58:34.500000	30.013	93	Normal	1	227	54	2.56	0.72	0.15596	0.390625	0.109863	1.27	0.27	0.36297	no value	NAN	no value	NAN	5090	250	6600	1100	no value	NAN	6060	780	47	13	42	14	no value	NAN	0.0131	0.0015	0.144	0.026	0.42	0.12	0.13	0.078
Output_1_26	002SMPL	23/10/2019 (4) 12:59:58.95	23/10/2019 (4)	00:59:58.900000	29.992	105	Normal	1	52	12	1.22	0.31	0.3509	0.819672	0.208277	0.9	0.17	0.38039	no value	NAN	no value	NAN	3610	220	4120	660	no value	NAN	4800	1200	53	17	27	10	no value	NAN	0.0289	0.0059	0.42	0.056	0.333	0.064	0.005	0.011
Output_1_27	002SMPL	23/10/2019 (4) 13:01:23.39	23/10/2019 (4)	00:01:23.400000	29.996	90	Normal	1	118	23	1.58	0.5	0.48408	0.632911	0.200288	0.799	0.065	0.45784	no value	NAN	no value	NAN	4380	260	4740	780	no value	NAN	4950	150	52	18	34	10	no value	NAN	0.0195	0.0028	0.04	0.012	0.454	0.071	2.66	0.46
Output_1_28	002SMPL	23/10/2019 (4) 13:02:47.49	23/10/2019 (4)	00:02:47.500000	29.978	0	Normal	1	no value	NAN	no value	NAN	NaN			no value	NAN	NaN	no value	NAN	no value	NAN	no value	NAN	no value	NAN	no value	NAN	no value	NAN	no value	NAN	no value	NAN	no value	NAN	0.00198	0.00036	0.0168	0.0053	0.259	0.057	no value	NAN
Output_1_29	002SMPL	23/10/2019 (4) 13:07:00.23	23/10/2019 (4)	00:07:00.200000	29.934	1	Normal	1	290	290	11	11	NaN	0.0909091	0.0909091	0.67	0.67	NaN	no value	NAN	no value	NAN	5800	5800	16000	16000	no value	NAN	4700	4700	2300	2300	1400	1400	no value	NAN	0.00179	0.00045	0.0135	0.0049	0.295	0.07	-0.0014	-0.0014
Output_1_30	002SMPL	23/10/2019 (4) 13:08:24.30	23/10/2019 (4)	00:08:24.300000	29.99	0	Normal	1	no value	NAN	no value	NAN	NaN			no value	NAN	NaN	no value	NAN	no value	NAN	no value	NAN	no value	NAN	no value	NAN	no value	NAN	no value	NAN	no value	NAN	no value	NAN	0.0012	0.0003	0.015	0.0057	0.315	0.074	no value	NAN
Output_1_31	002SMPL	23/10/2019 (4) 13:09:48.38	23/10/2019 (4)	00:09:48.400000	30.014	48	Normal	1	430	110	6.1	1.1	0.07436	0.163934	0.029562	0.86	0.16	0.019951	no value	NAN	no value	NAN	5990	230	11500	1200	no value	NAN	5080	370	203	78	122	48	no value	NAN	0.0072	0.0012	0.043	0.01	0.374	0.074	0.43	0.29
Output_1_32	002SMPL	23/10/2019 (4) 13:11:12.41	23/10/2019 (4)	00:11:12.400000	29.964	33	Normal	1	770	300	12.6	2.9	0.85469	0.0793651	0.0182666	0.772	0.069	0.10447	no value	NAN	no value	NAN	6450	310	15700	1300	no value	NAN	4890	160	120	160	103	94	no value	NAN	0.00481	0.00073	0.027	0.015	0.409	0.09	0.42	0.21
Output_1_33	002SMPL	23/10/2019 (4) 13:15:24.64	23/10/2019 (4)	00:15:24.600000	29.998	11	Normal	1	390	130	11.1	3.2	0.96213	0.0900901	0.0259719	0.779	0.05	0.26008	no value	NAN	no value	NAN	5970	270	15600	1400	no value	NAN	4910	110	60	210	50	150	no value	NAN	0.00143	0.0005	0.0058	0.0037	0.244	0.054	0.84	0.37
Output_1_34	002SMPL	23/10/2019 (4) 13:16:48.72	23/10/2019 (4)	00:16:48.700000	30.014	0	Normal	1	no value	NAN	no value	NAN	NaN			no value	NAN	NaN	no value	NAN	no value	NAN	no value	NAN	no value	NAN	no value	NAN	no value	NAN	no value	NAN	no value	NAN	no value	NAN	0.00089	0.00033	0.0061	0.003	0.215	0.044	no value	NAN
Output_1_35	002SMPL	23/10/2019 (4) 13:18:12.81	23/10/2019 (4)	00:18:12.800000	30.004	2	Normal	1	485	85	17.1	6.4	1	0.0584795	0.0218871	0.73	0.16	1	no value	NAN	no value	NAN	6280	180	18600	2300	no value	NAN	4800	360	205.8	1.8	139	32	no value	NAN	0.00197	0.00055	0.0083	0.0052	0.236	0.05	0.3	0.61
Output_1_36	002SMPL	23/10/2019 (4) 13:19:36.96	23/10/2019 (4)	00:19:37	29.952	193	Normal	1	55.4	4.9	0.532	0.057	0.14531	1.8797	0.201396	0.802	0.067	0.3187	no value	NAN	no value	NAN	3978	81	2660	230	no value	NAN	4870	180	42	12	27.4	9.6	no value	NAN	0.0711	0.0056	0.439	0.047	0.427	0.084	0.109	0.068
Output_1_37	002SMPL	23/10/2019 (4) 13:23:49.33	23/10/2019 (4)	00:23:49.300000	29.964	4	Normal	1	600	300	18.5	7.7	0.85818	0.054054	0.0224982	0.79	0.18	0.06625	no value	NAN	no value	NAN	6400	490	18700	2600	no value	NAN	4940	400	730	740	560	630	no value	NAN	0.00196	0.00044	0.0079	0.005	0.204	0.045	0.1	0.21
Output_1_38	002SMPL	23/10/2019 (4) 13:25:13.48	23/10/2019 (4)	00:25:13.500000	29.938	161	Normal	1	84	15	1.36	0.35	0.69944	0.735294	0.18923	0.815	0.099	0.67638	no value	NAN	no value	NAN	4140	160	4140	630	no value	NAN	4900	390	30.2	8.8	21.9	7.2	no value	NAN	0.0238	0.0029	0.148	0.025	0.193	0.035	0.4	0.11
Output_1_39	002SMPL	23/10/2019 (4) 13:26:37.46	23/10/2019 (4)	00:26:37.500000	29.982	109	Normal	1	35	12	0.57	0.35	0.88738	1.75439	1.07726	1.06	0.25	0.83194	no value	NAN	no value	NAN	3060	220	1310	300	no value	NAN	5510	730	30	18	19.6	7.9	no value	NAN	0.0205	0.0026	0.034	0.013	0.18	0.036	3.64	0.39
Output_1_40	002SMPL	23/10/2019 (4) 13:28:01.52	23/10/2019 (4)	00:28:01.500000	30.014	130	Normal	1	253	45	2.77	0.52	0.08069	0.361011	0.067771	0.85	0.16	0.59398	no value	NAN	no value	NAN	5130	220	7090	740	no value	NAN	5900	1100	34	15	29	12	no value	NAN	0.0092	0.001	0.035	0.013	0.237	0.053	0.96	0.14
Output_1_41	002SMPL	23/10/2019 (4) 13:32:14.03	23/10/2019 (4)	00:32:14	30.014	175	Normal	1	317	61	2.95	0.48	0.5861	0.338983	0.0551566	0.98	0.16	0.69923	no value	NAN	no value	NAN	5200	200	7350	710	no value	NAN	5150	400	45.3	9.1	33.1	6.7	no value	NAN	0.017	0.0024	0.365	0.067	0.69	0.15	0.52	0.13
Output_1_42	002SMPL	23/10/2019 (4) 13:33:38.15	23/10/2019 (4)	00:33:38.200000	30.028	224	Normal	1	107	20	1.19	0.28	0.70685	0.840336	0.197726	0.86	0.13	0.4108	no value	NAN	no value	NAN	4040	190	3470	530	no value	NAN	5350	620	26.2	5.8	18.4	4.2	no value	NAN	0.0269	0.0017	0.433	0.077	0.267	0.063	0.81	0.22
Output_1_43	002SMPL	23/10/2019 (4) 13:35:02.26	23/10/2019 (4)	00:35:02.300000	30.004	48	Normal	1	123	44	1.89	0.38	-0.0064779	0.5291	0.10638	0.79	0.22	-0.015592	no value	NAN	no value	NAN	4590	210	6310	740	no value	NAN	4710	610	100	67	65	41	no value	NAN	0.0077	0.0013	0.064	0.02	0.33	0.086	1.83	0.61
Output_1_44	002SMPL	23/10/2019 (4) 13:36:26.42	23/10/2019 (4)	00:36:26.400000	29.918	114	Normal	1	420	110	3.77	0.73	0.35028	0.265252	0.0513618	1.15	0.29	0.27006	no value	NAN	no value	NAN	5530	220	8750	910	no value	NAN	5420	710	62	21	30	25	no value	NAN	0.0091	0.001	0.213	0.057	0.29	0.061	0.68	0.21
Output_1_45	002SMPL	23/10/2019 (4) 13:40:39.24	23/10/2019 (4)	00:40:39.200000	29.946	11	Normal	1	470	260	15.6	9.6	0.98739	0.0641026	0.0394477	0.703	0.049	0.21699	no value	NAN	no value	NAN	5910	540	16000	3300	no value	NAN	4740	110	180	53	123	37	no value	NAN	0.0013	0.00032	0.028	0.015	0.183	0.053	1.2	1.4
Output_1_46	002SMPL	23/10/2019 (4) 13:42:03.22	23/10/2019 (4)	00:42:03.200000	29.991	81	Normal	1	168	33	3.04	0.71	0.28066	0.328947	0.0768265	0.86	0.16	0.45493	no value	NAN	no value	NAN	4830	240	7800	1000	no value	NAN	4850	420	88	33	37	16	no value	NAN	0.0095	0.0013	0.261	0.053	0.268	0.062	0.73	0.35
Output_1_47	002SMPL	23/10/2019 (4) 13:43:27.39	23/10/2019 (4)	00:43:27.400000	29.99	163	Normal	1	148	36	2.62	0.71	0.37953	0.381679	0.103432	0.98	0.16	0.5352	no value	NAN	no value	NAN	4240	250	5400	900	no value	NAN	5010	450	38	11	24	10	no value	NAN	0.0188	0.0022	0.138	0.046	0.278	0.058	2.48	0.4
Output_1_48	002SMPL	23/10/2019 (4) 13:44:51.46	23/10/2019 (4)	00:44:51.500000	29.958	45	Normal	1	374	84	6.6	1.2	0.47954	0.151515	0.0275482	0.702	0.089	0.28653	no value	NAN	no value	NAN	5880	250	12000	1100	no value	NAN	4670	240	105	29	71	21	no value	NAN	0.0051	0.0009	0.267	0.061	0.365	0.073	0.59	0.29
Output_1_49	002SMPL	23/10/2019 (4) 13:49:04.23	23/10/2019 (4)	00:49:04.200000	29.922	2	Normal	1	600	860	21	30	1	0.0476191	0.0680272	0.6886	0.0092	-1	no value	NAN	no value	NAN	6100	1800	18000	11000	no value	NAN	4711	21	250	130	176	90	no value	NAN	0.00297	0.0004	0.107	0.041	0.271	0.077	0.23	0.45
Output_1_50	002SMPL	23/10/2019 (4) 13:50:28.21	23/10/2019 (4)	00:50:28.200000	30.006	0	Normal	1	no value	NAN	no value	NAN	NaN			no value	NAN	NaN	no value	NAN	no value	NAN	no value	NAN	no value	NAN	no value	NAN	no value	NAN	no value	NAN	no value	NAN	no value	NAN	0.00245	0.00036	0.022	0.014	0.201	0.05	no value	NAN
